# Supplementary material for: Deciphering nanoparticle protein coronas by capillary isoelectric focusing-mass spectrometry-based top-down proteomics
Source: Chem Commun (Camb). 2024 Sep 11;60(81):11528–31. doi: 10.1039/d4cc02666g (PMC11418007; doi:10.1039/d4cc02666g)
Supplement: CC-060-D4CC02666G-s001 [file CC-060-D4CC02666G-s001.xlsx]

## Sheet: Note
The lists of identified proteoforms from one protein corona sample by cIEF-MS/MS in technical duplicate in the High-High mode. The proteoform identification was filtered by a 1% proteoform-level FDR.
The basic parameters for database search using TopPIC were also included.

## Sheet: Proteoform ID_run1
********************** Parameters **********************
Protein database file:	I:/Guijie/database_TDP_corona.fasta
Spectrum file:	I:/Guijie/Corona480/S2_80cmCap_20cmSamp_8cmCathoHH_01_ms2.msalign
Number of combined spectra:	1
Fragmentation method:	FILE
Search type:	TARGET+DECOY
Allowed N-terminal forms:	NONE,NME,NME_ACETYLATION,M_ACETYLATION
Maximum number of unexpected modifications:	1
Maximum mass shift of modifications:	500 Da
Minimum mass shift of modifications:	-500 Da
Spectrum-level cutoff type:	FDR
Spectrum-level cutoff value:	0.01
Proteoform-level cutoff type:	FDR
Proteoform-level cutoff value:	0.01
Error tolerance for matching masses:	10 ppm
Error tolerance for identifying PrSM clusters:	1.2 Da
Use TopFD feature file:	TRUE
E-value computation:	Generating function
Localization with MIScore:	FALSE
Thread number:	5
Executable file directory:	F:\software\toppic-windows-1.6.2\toppic-windows-1.6.2
Start time:	Thu Jan 11 13:50:46 2024
End time:	Thu Jan 11 14:09:19 2024
Version:	1.6.2
********************** Parameters **********************
Data file name	Prsm ID	Spectrum ID	Fragmentation	Scan(s)	Retention time	#peaks	Charge	Precursor mass	Adjusted precursor mass	Proteoform ID	Feature intensity	Feature score	Feature apex time	#Protein hits	Protein accession	Protein description	First residue	Last residue	Special amino acids	Database protein sequence	Proteoform	Proteoform mass	Protein N-terminal form	Fixed PTMs	#unexpected modifications	unexpected modifications	#variable PTMs	variable PTMs	MIScore	#matched peaks	#matched fragment ions	E-value	Spectrum-level Q-value	Proteoform-level Q-value
I:/Guijie/Corona480/S2_80cmCap_20cmSamp_8cmCathoHH_01_ms2.msalign	0	266	HCD	799	1193.25	113	5	7080.84	7080.98	48	3.222e+05	-1000	1130.51	4	sp|P02768|ALBU_HUMAN	Albumin OS=Homo sapiens OX=9606 GN=ALB PE=1 SV=2	25	84		DAHKSEVAHRFKDLGEENFKALVLIAFAQYLQQCPFEDHVKLVNEVTEFAKTCVADESAE	R.DAHKSEVAHRFKDLGEENFKALVLIAFAQYLQQCPFEDHVK(LVNEVT)[+274.6374]EFAKTCVADESAE.N	7080.98	NONE		1	+274.6374:[42-47]	0		-	19	14	0.000177052	0	0
I:/Guijie/Corona480/S2_80cmCap_20cmSamp_8cmCathoHH_01_ms2.msalign	1	282	HCD	818	1210.09	43	5	8307.37	8307.54	49	4.312e+06	-715.086	1243.28	4	sp|P02768|ALBU_HUMAN	Albumin OS=Homo sapiens OX=9606 GN=ALB PE=1 SV=2	25	94		DAHKSEVAHRFKDLGEENFKALVLIAFAQYLQQCPFEDHVKLVNEVTEFAKTCVADESAENCDKSLHTLF	R.DAHKSEVAHRFKDLGEENFKALVLIAFAQY(LQQCPFEDHVKLVNEVTEFAKTCVADESAENCDKSLHTLF)[+342.6468].G	8307.54	NONE		1	+342.6468:[31-70]	0		-	14	11	0.000183978	0	0
I:/Guijie/Corona480/S2_80cmCap_20cmSamp_8cmCathoHH_01_ms2.msalign	2	287	HCD	823	1214.05	133	7	11939.8	11938.9	47	1.007e+06	-1000	1202.23	4	sp|P02768|ALBU_HUMAN	Albumin OS=Homo sapiens OX=9606 GN=ALB PE=1 SV=2	25	132		DAHKSEVAHRFKDLGEENFKALVLIAFAQYLQQCPFEDHVKLVNEVTEFAKTCVADESAENCDKSLHTLFGDKLCTVATLRETYGEMADCCAKQEPERNECFLQHKDD	R.DAHKSEVAHRFKDLGEENFKALVLIAFAQYLQQCPFEDHVKLVNEVTEFAKTCVADESAE(NCDKSLHTLFGDKLCTVATLRETYGEMA)[-353.9049]DCCAKQEPERNECFLQHKDD.N	11938.9	NONE		1	-353.9049:[61-88]	0		-	24	18	0.00013808	0	0
I:/Guijie/Corona480/S2_80cmCap_20cmSamp_8cmCathoHH_01_ms2.msalign	3	408	HCD	965	1333.05	32	8	6627.5	6626.45	43	1.112e+08	25.8864	1343.08	1	sp|P02654|APOC1_HUMAN	Apolipoprotein C-I OS=Homo sapiens OX=9606 GN=APOC1 PE=1 SV=1	27	83		TPDVSSALDKLKEFGNTLEDKARELISRIKQSELSAKMREWFSETFQKVKEKLKIDS	G.TPDVSSALDKLK(EFGNTLEDKARELISRIKQSE)[-0.0573]LSAKMREWFSETFQKVKEKLKIDS.	6626.45	NONE		1	-0.0573:[13-33]	0		-	11	10	2.75467185e-05	0	0
I:/Guijie/Corona480/S2_80cmCap_20cmSamp_8cmCathoHH_01_ms2.msalign	5	498	HCD	1070	1419.89	182	14	11674.4	11675.5	35	1.144e+09	-2.02297	1412.54	1	sp|P0DJI8|SAA1_HUMAN	Serum amyloid A-1 protein OS=Homo sapiens OX=9606 GN=SAA1 PE=1 SV=1	19	122		RSFFSFLGEAFDGARDMWRAYSDMREANYIGSDKYFHARGNYDAAKRGPGGVWAAEAISDARENIQRFFGHGAEDSLADQAANEWGRSGKDPNHFRPAGLPEKY	S.RSFFSFLGEAFDGARDMWRAYSDMREANYIGSDKYFHARGNYDAAKRGPGGVWAAEAISDARENIQRFFGHGAEDSLADQAANEWGRSGKDPNHFRPAGLPEKY.	11675.5	NONE		0		0		-	23	19	3.20646e-07	0	0
I:/Guijie/Corona480/S2_80cmCap_20cmSamp_8cmCathoHH_01_ms2.msalign	6	516	HCD	1091	1437.26	93	14	11518.3	11518.3	34	1.568e+09	-42.1952	1435.7	1	sp|P0DJI8|SAA1_HUMAN	Serum amyloid A-1 protein OS=Homo sapiens OX=9606 GN=SAA1 PE=1 SV=1	20	122		SFFSFLGEAFDGARDMWRAYSDMREANYIGSDKYFHARGNYDAAKRGPGGVWAAEAISDARENIQRFFGHGAEDSLADQAANEWGRSGKDPNHFRPAGLPEKY	R.SFFSFLGEAFDGARDMWRAYSDMREANYIGSDKYFHARGNYDAAKRGPGGVWAA(EAISDARENIQRFFGHGAEDS)[-1.1155]LADQAANEWGRSGKDPNHFRPAGLPEKY.	11518.3	NONE		1	-1.1155:[55-75]	0		-	25	20	2.704905e-07	0	0
I:/Guijie/Corona480/S2_80cmCap_20cmSamp_8cmCathoHH_01_ms2.msalign	7	523	HCD	1099	1443.84	96	13	11536.3	11535.3	45	3.994e+08	-8.91115	1435.7	1	tr|E9PQD6|E9PQD6_HUMAN	Serum amyloid A protein OS=Homo sapiens OX=9606 GN=SAA1 PE=1 SV=1	20	122		SFFSFLGEAFDGARDMWRAYSDMREANYIGSDKYFHARGNYDAAKRGPGGAWAAEVITDARENIQRFFGHGAEDSLADQAANEWGRSGKDPNHFRPAGLPEKY	R.SFFSFLGEAFDGARDMWRAYSD(MREANYIGSDKYFHARGNYDAAKRGPGGAWAAEVITDARENIQRFFGHGAEDS)[+1.8794]LADQAANEWGRSGKDPNHFRPAGLPEKY.	11535.3	NONE		1	+1.8794:[23-75]	0		-	19	16	4.98825348e-05	0	0
I:/Guijie/Corona480/S2_80cmCap_20cmSamp_8cmCathoHH_01_ms2.msalign	8	526	HCD	1102	1446.21	133	15	11432.3	11432.4	53	4.651e+08	-132.758	1435.7	1	sp|P0DJI8|SAA1_HUMAN	Serum amyloid A-1 protein OS=Homo sapiens OX=9606 GN=SAA1 PE=1 SV=1	21	122		FFSFLGEAFDGARDMWRAYSDMREANYIGSDKYFHARGNYDAAKRGPGGVWAAEAISDARENIQRFFGHGAEDSLADQAANEWGRSGKDPNHFRPAGLPEKY	S.FFSFLGEAFDGARDMWRAYSDMREANYIGSDKYFHARGNYDAAKRGPGGVWAAEAISDARENIQRFFGHGAEDSLADQAANEWGRSGKDPNHFRPAGLPEKY.	11432.4	NONE		0		0		-	10	10	0.00031055	0	0
I:/Guijie/Corona480/S2_80cmCap_20cmSamp_8cmCathoHH_01_ms2.msalign	11	556	HCD	1137	1475.22	88	8	6184.34	6184.26	12	1.260e+07	-474.746	1470.49	2	sp|P02647|APOA1_HUMAN	Apolipoprotein A-I OS=Homo sapiens OX=9606 GN=APOA1 PE=1 SV=1	213	267		LAEYHAKATEHLSTLSEKAKPALEDLRQGLLPVLESFKVSFLSALEEYTKKLNTQ	R.LAEYHAKATEHLSTLSEKAKPALED(LRQGL)[-0.0472]LPVLESFKVSFLSALEEYTKKLNTQ.	6184.26	NONE		1	-0.0472:[26-30]	0		-	31	24	2.82730382e-13	0	0
I:/Guijie/Corona480/S2_80cmCap_20cmSamp_8cmCathoHH_01_ms2.msalign	13	611	HCD	1201	1528.31	264	24	28090.3	28091.2	55	1.828e+10	33.2553	1400.95	1	tr|F8W696|F8W696_HUMAN	Apolipoprotein A1 OS=Homo sapiens OX=9606 GN=APOA1 PE=1 SV=1	1	245		MSGGARGFCMLKAPHSARPFFSSRSPTALQDESCGADLGRALPDGLKLLDNWDSVTSTFSKLREQLGPVTQEFWDNLEKETEGLRQEMSKDLEEVKAKVQPYLDDFQKKWQEEMELYRQKVEPLRAELQEGARQKLHELQEKLSPLGEEMRDRARAHVDALRTHLAPYSDELRQRLAARLEALKENGGARLAEYHAKATEHLSTLSEKAKPALEDLRQGLLPVLESFKVSFLSALEEYTKKLNTQ	.[Acetyl]-MSGGARGFCMLKAPHSARPFFSSRSPTALQDESCGADLGRALPDGLKLLDN(WDSVTSTFSKLREQL)[+157.9474]GPVTQEFWDNLEKETEGLRQEMSKDLEEVKAKVQPYLDDFQKKWQEEMELYRQKVEPLRAELQEGARQKLHELQEKLSPLGEEMRDRARAHVDALRTHLAPYSDELRQRLAARLEALKENGGARLAEYHAKATEHLSTLSEKAKPALEDLRQGLLPVLESFKVSFLSALEEYTKKLNTQ.	28091.2	M_ACETYLATION		1	+157.9474:[52-66]	0		-	26	23	0.000618083	0	0
I:/Guijie/Corona480/S2_80cmCap_20cmSamp_8cmCathoHH_01_ms2.msalign	14	637	HCD	1232	1554.55	63	5	9261.38	9261.56	59	5.448e+06	-576.96	1511.19	2	tr|H0YAS8|H0YAS8_HUMAN	Clusterin (Fragment) OS=Homo sapiens OX=9606 GN=CLU PE=1 SV=1	58	140		NWVSRLANLTQGEDQYYLRVTTVASHTSDSDVPSGVTEVVVKLFDSDPITVTVPVEVSRKNPKFMETVAEKALQEYRKKHREE	F.(NWVSRLANLTQGEDQYYLRVTTVASHTSDSDVPSGVTEVVVK)[-184.2687]LFDSDPITVTVPVEVSRKNPKFMETVAEKALQEYRKKHREE.	9261.56	NONE		1	-184.2687:[1-42]	0		-	7	7	0.00189496	0	0
I:/Guijie/Corona480/S2_80cmCap_20cmSamp_8cmCathoHH_01_ms2.msalign	15	642	HCD	1238	1559.63	83	7	5371.91	5371.86	3	5.778e+06	-33.3736	1552.21	2	sp|P02647|APOA1_HUMAN	Apolipoprotein A-I OS=Homo sapiens OX=9606 GN=APOA1 PE=1 SV=1	220	267		ATEHLSTLSEKAKPALEDLRQGLLPVLESFKVSFLSALEEYTKKLNTQ	K.ATEHLSTLSEKAKPALEDLRQGLLPVLESFKV(S)[-0.0347]FLSALEEYTKKLNTQ.	5371.86	NONE		1	-0.0347:[33]	0		-	37	34	4.13953176e-19	0	0
I:/Guijie/Corona480/S2_80cmCap_20cmSamp_8cmCathoHH_01_ms2.msalign	16	648	HCD	1245	1565.68	143	24	18430.1	18431.3	57	4.390e+06	-39.1035	1516.98	2	sp|P02647|APOA1_HUMAN	Apolipoprotein A-I OS=Homo sapiens OX=9606 GN=APOA1 PE=1 SV=1	111	267		SKDLEEVKAKVQPYLDDFQKKWQEEMELYRQKVEPLRAELQEGARQKLHELQEKLSPLGEEMRDRARAHVDALRTHLAPYSDELRQRLAARLEALKENGGARLAEYHAKATEHLSTLSEKAKPALEDLRQGLLPVLESFKVSFLSALEEYTKKLNTQ	M.SKDLEEVKAKVQPYLDDFQKKWQEEMELYRQKVEPLRAELQEGARQKLHELQEKLSPLGEEMRDRARAHVDALRTHLAPYSDELRQRLAARLEALKENGGARLAEYHAK(AT)[+264.7506]EHLSTLSEKAKPALEDLRQGLLPVLESFKVSFLSALEEYTKKLNTQ.	18431.3	NONE		1	+264.7506:[110-111]	0		-	16	14	0.00077852	0	0
I:/Guijie/Corona480/S2_80cmCap_20cmSamp_8cmCathoHH_01_ms2.msalign	17	676	HCD	1277	1592.32	103	8	6926.7	6926.67	17	6.892e+06	-67.5082	1458.86	2	tr|A0A024R6N5|A0A024R6N5_HUMAN	Alpha-1-antitrypsin OS=Homo sapiens OX=9606 GN=SERPINA1 PE=1 SV=1	356	418		AVHKAVLTIDEKGTEAAGAMFLEAIPMSIPPEVKFNKPFVFLMIEQNTKSPLFMGKVVNPTQK	K.AVHKAVLTIDEKGTEAAGAMFLEAIPMSIPPEVKFNKPFVFLMIEQNTKSPLFMGKVVNPTQK.	6926.67	NONE		0		0		-	40	21	4.78429e-11	0	0
I:/Guijie/Corona480/S2_80cmCap_20cmSamp_8cmCathoHH_01_ms2.msalign	18	720	HCD	1329	1635.91	67	5	4175.29	4175.26	6	3.057e+06	-9.51439	1628.53	2	sp|P02647|APOA1_HUMAN	Apolipoprotein A-I OS=Homo sapiens OX=9606 GN=APOA1 PE=1 SV=1	231	267		AKPALEDLRQGLLPVLESFKVSFLSALEEYTKKLNTQ	K.AKPALEDLRQGLLPVLESFKV(SFL)[-0.0301]SALEEYTKKLNTQ.	4175.26	NONE		1	-0.0301:[22-24]	0		-	25	20	2.82213048e-16	0	0
I:/Guijie/Corona480/S2_80cmCap_20cmSamp_8cmCathoHH_01_ms2.msalign	19	729	HCD	1339	1644.37	109	27	22519.7	22520	44	1.836e+06	-1000	1657.87	2	sp|P02647|APOA1_HUMAN	Apolipoprotein A-I OS=Homo sapiens OX=9606 GN=APOA1 PE=1 SV=1	75	267		DSVTSTFSKLREQLGPVTQEFWDNLEKETEGLRQEMSKDLEEVKAKVQPYLDDFQKKWQEEMELYRQKVEPLRAELQEGARQKLHELQEKLSPLGEEMRDRARAHVDALRTHLAPYSDELRQRLAARLEALKENGGARLAEYHAKATEHLSTLSEKAKPALEDLRQGLLPVLESFKVSFLSALEEYTKKLNTQ	W.DSVTSTFSKLREQLGPVTQEFWDNLEKETEGLRQEMSKDLEEVKAKVQPYLDDFQKKWQEEMELYRQKVEPLRAELQEGARQKLHELQEKLSPLGEEMRDRARAHVDALRTHLAPYSDEL(RQRLAARLEALKENGGARLAEYHAKATEHLSTLSEKAK)[+144.3538]PALEDLRQGLLPVLESFKVSFLSALEEYTKKLNTQ.	22520	NONE		1	+144.3538:[121-158]	0		-	17	14	3.81192938e-05	0	0
I:/Guijie/Corona480/S2_80cmCap_20cmSamp_8cmCathoHH_01_ms2.msalign	26	757	HCD	1372	1671.98	96	8	8749.35	8749.28	56	3.801e+07	-0.982767	1669.63	1	tr|V9GYS1|V9GYS1_HUMAN	Apolipoprotein A-II OS=Homo sapiens OX=9606 GN=APOA2 PE=1 SV=1	1	81		MKLLAATVLLLTICSLEGALVRRQAKEPCVESLVSQYFQTVTDYGKDLMEKVKSPELQAEAKSYFENFLSYFVELGTQPAT	.[Acetyl]-MKL(LAATVLLLTICS)[-368.4070]LEGALVRRQAKEPCVESLVSQYFQTVTDYGKDLMEKVKSPELQAEAKSYFENFLSYFVELGTQPAT.Q	8749.28	M_ACETYLATION		1	-368.4070:[4-15]	0		-	25	18	0.000676991	0	0
I:/Guijie/Corona480/S2_80cmCap_20cmSamp_8cmCathoHH_01_ms2.msalign	27	758	HCD	1373	1672.77	142	8	8677.36	8676.27	41	8.493e+06	-350.958	1505.35	2	sp|P02652|APOA2_HUMAN	Apolipoprotein A-II OS=Homo sapiens OX=9606 GN=APOA2 PE=1 SV=1	22	99		RRQAKEPCVESLVSQYFQTVTDYGKDLMEKVKSPELQAEAKSYFEKSKEQLTPLIKKAGTELVNFLSYFVELGTQPAT	V.(RRQAKEPCVESL)[-210.3102]VSQYFQTVTDYGKDLMEKVKSPELQAEAKSYFEKSKEQLTPLIKKAGTELVNFLSYFVELGTQPAT.Q	8676.27	NONE		1	-210.3102:[1-12]	0		-	35	24	1.923378085e-05	0	0
I:/Guijie/Corona480/S2_80cmCap_20cmSamp_8cmCathoHH_01_ms2.msalign	28	762	HCD	1378	1677.16	94	8	8749.35	8749.28	46	3.801e+07	-0.982767	1669.63	2	sp|P02652|APOA2_HUMAN	Apolipoprotein A-II OS=Homo sapiens OX=9606 GN=APOA2 PE=1 SV=1	23	99		RQAKEPCVESLVSQYFQTVTDYGKDLMEKVKSPELQAEAKSYFEKSKEQLTPLIKKAGTELVNFLSYFVELGTQPAT	R.RQAKEPCVESLV(SQYFQTVTDYGKDLMEKVKSPELQAEAKSYFEKSKEQLT)[+18.8025]PLIKKAGTELVNFLSYFVELGTQPAT.Q	8749.28	NONE		1	+18.8025:[13-51]	0		-	32	22	0.00011135	0	0
I:/Guijie/Corona480/S2_80cmCap_20cmSamp_8cmCathoHH_01_ms2.msalign	29	763	HCD	1379	1677.95	146	8	8791.17	8791.15	32	8.179e+07	31.9891	1663.68	2	sp|P02656|APOC3_HUMAN	Apolipoprotein C-III OS=Homo sapiens OX=9606 GN=APOC3 PE=1 SV=1	22	99		EAEDASLLSFMQGYMKHATKTAKDALSSVQESQVAQQARGWVTDGFSSLKDYWSTVKDKFSEFWDLDPEVRPTSAVAA	S.EAEDASLLS(FMQGYMKHATKTAKDALSSVQESQV)[+118.9610]AQQARGWVTDGFSSLKDYWSTVKDKFSEFWDLDPEVRPTSAVAA.	8791.15	NONE		1	+118.9610:[10-34]	0		-	32	22	2.1914361e-07	0	0
I:/Guijie/Corona480/S2_80cmCap_20cmSamp_8cmCathoHH_01_ms2.msalign	30	768	HCD	1385	1683.07	100	8	8804.38	8804.32	31	7.999e+07	12.7802	1681.51	2	sp|P02652|APOA2_HUMAN	Apolipoprotein A-II OS=Homo sapiens OX=9606 GN=APOA2 PE=1 SV=1	25	100		AKEPCVESLVSQYFQTVTDYGKDLMEKVKSPELQAEAKSYFEKSKEQLTPLIKKAGTELVNFLSYFVELGTQPATQ	Q.AKEPC(VESLVSQYFQTVTDYGKDLMEKVKSPELQAEAKSYFEKSK)[+229.9399]EQLTPLIKKAGTELVNFLSYFVELGTQPATQ.	8804.32	NONE		1	+229.9399:[6-45]	0		-	35	24	1.341238824e-07	0	0
I:/Guijie/Corona480/S2_80cmCap_20cmSamp_8cmCathoHH_01_ms2.msalign	31	770	HCD	1387	1684.64	55	7	8804.43	8804.32	24	7.999e+07	12.7802	1681.51	1	tr|V9GYS1|V9GYS1_HUMAN	Apolipoprotein A-II OS=Homo sapiens OX=9606 GN=APOA2 PE=1 SV=1	1	82		MKLLAATVLLLTICSLEGALVRRQAKEPCVESLVSQYFQTVTDYGKDLMEKVKSPELQAEAKSYFENFLSYFVELGTQPATQ	.[Acetyl]-MKLL(AATVLLLTICSLEGALVRRQAKEPCVESLVSQYFQTVTDYGKDLMEKVKSPELQAEAKSYFE)[-441.4160]NFLSYFVELGTQPATQ.	8804.32	M_ACETYLATION		1	-441.4160:[5-66]	0		-	22	19	3.17248e-09	0	0
I:/Guijie/Corona480/S2_80cmCap_20cmSamp_8cmCathoHH_01_ms2.msalign	34	776	HCD	1394	1690.45	73	8	8538.35	8539.27	52	4.046e+07	29.8892	1681.51	2	sp|P02652|APOA2_HUMAN	Apolipoprotein A-II OS=Homo sapiens OX=9606 GN=APOA2 PE=1 SV=1	24	99		QAKEPCVESLVSQYFQTVTDYGKDLMEKVKSPELQAEAKSYFEKSKEQLTPLIKKAGTELVNFLSYFVELGTQPAT	R.QAKEP(CVESLVSQYFQTVTDYGKDLMEKVKSPELQAEAKSYFEKSKEQLTPLI)[-35.1100]KKAGTELVNFLSYFVELGTQPAT.Q	8539.27	NONE		1	-35.1100:[6-53]	0		-	27	19	0.000286723	0	0
I:/Guijie/Corona480/S2_80cmCap_20cmSamp_8cmCathoHH_01_ms2.msalign	36	778	HCD	1396	1692.1	104	8	8590.27	8591.2	51	3.506e+07	30.1183	1687.32	2	sp|P02652|APOA2_HUMAN	Apolipoprotein A-II OS=Homo sapiens OX=9606 GN=APOA2 PE=1 SV=1	23	98		RQAKEPCVESLVSQYFQTVTDYGKDLMEKVKSPELQAEAKSYFEKSKEQLTPLIKKAGTELVNFLSYFVELGTQPA	R.RQAKEPCVESLV(SQYFQTVTDYGKDLMEKVKSPELQAEAKSYFEKSKEQLT)[-38.2285]PLIKKAGTELVNFLSYFVELGTQPA.T	8591.2	NONE		1	-38.2285:[13-51]	0		-	33	21	0.000197101	0	0
I:/Guijie/Corona480/S2_80cmCap_20cmSamp_8cmCathoHH_01_ms2.msalign	40	786	HCD	1406	1700.62	116	8	8666.37	8666.32	22	1.003e+08	21.3764	1704.92	2	sp|P02652|APOA2_HUMAN	Apolipoprotein A-II OS=Homo sapiens OX=9606 GN=APOA2 PE=1 SV=1	25	100		AKEPCVESLVSQYFQTVTDYGKDLMEKVKSPELQAEAKSYFEKSKEQLTPLIKKAGTELVNFLSYFVELGTQPATQ	Q.AKEPCVESLVSQYFQTVTDYGKDLMEKVKSPELQAEAKSYFEKS(K)[+91.9401]EQLTPLIKKAGTELVNFLSYFVELGTQPATQ.	8666.32	NONE		1	+91.9401:[45]	0		-	37	28	2.41919824e-09	0	0
I:/Guijie/Corona480/S2_80cmCap_20cmSamp_8cmCathoHH_01_ms2.msalign	41	788	HCD	1408	1702.19	142	7	8666.37	8667.36	8	1.003e+08	21.3764	1704.92	2	tr|V9GYM3|V9GYM3_HUMAN	Apolipoprotein A-II OS=Homo sapiens OX=9606 GN=APOA2 PE=1 SV=1	57	133		QAKEPCVESLVSQYFQTVTDYGKDLMEKVKSPELQAEAKSYFEKSKEQLTPLIKKAGTELVNFLSYFVELGTQPATQ	R.(QA)[-35.0815]KEPCVESLVSQYFQTVTDYGKDLMEKVKSPELQAEAKSYFEKSKEQLTPLIKKAGTELVNFLSYFVELGTQPATQ.	8667.36	NONE		1	-35.0815:[1-2]	0		-	55	36	8.05239375e-15	0	0
I:/Guijie/Corona480/S2_80cmCap_20cmSamp_8cmCathoHH_01_ms2.msalign	42	789	HCD	1409	1703.07	103	8	8876.41	8877.33	27	1.947e+08	29.0396	1687.32	1	tr|V9GYS1|V9GYS1_HUMAN	Apolipoprotein A-II OS=Homo sapiens OX=9606 GN=APOA2 PE=1 SV=1	1	82		MKLLAATVLLLTICSLEGALVRRQAKEPCVESLVSQYFQTVTDYGKDLMEKVKSPELQAEAKSYFENFLSYFVELGTQPATQ	.[Acetyl]-MKLL(AATVLLLTICSLEGALVRRQAKEPCVESLVSQYFQTVTDYGKDLMEKVKSPELQAEAKSYFE)[-368.4067]NFLSYFVELGTQPATQ.	8877.33	M_ACETYLATION		1	-368.4067:[5-66]	0		-	29	22	1.65937e-08	0	0
I:/Guijie/Corona480/S2_80cmCap_20cmSamp_8cmCathoHH_01_ms2.msalign	47	805	HCD	1428	1718.86	51	8	8692.3	8692.26	50	1.013e+09	42.9702	1704.92	1	tr|V9GYS1|V9GYS1_HUMAN	Apolipoprotein A-II OS=Homo sapiens OX=9606 GN=APOA2 PE=1 SV=1	1	81		MKLLAATVLLLTICSLEGALVRRQAKEPCVESLVSQYFQTVTDYGKDLMEKVKSPELQAEAKSYFENFLSYFVELGTQPAT	.[Acetyl]-MKL(LAATVLLLTICSLEGALVRRQAKEPCVESLVSQYFQTVTDYGKDLMEKVKSPELQAEAKSYFEN)[-425.4268]FLSYFVELGTQPAT.Q	8692.26	M_ACETYLATION		1	-425.4268:[4-67]	0		-	21	16	0.000185705	0	0
I:/Guijie/Corona480/S2_80cmCap_20cmSamp_8cmCathoHH_01_ms2.msalign	49	811	HCD	1435	1724.64	58	8	8819.35	8819.31	30	3.348e+09	53.8934	1722.3	1	tr|V9GYS1|V9GYS1_HUMAN	Apolipoprotein A-II OS=Homo sapiens OX=9606 GN=APOA2 PE=1 SV=1	1	82		MKLLAATVLLLTICSLEGALVRRQAKEPCVESLVSQYFQTVTDYGKDLMEKVKSPELQAEAKSYFENFLSYFVELGTQPATQ	.[Acetyl]-MKLL(AATVLLLTICS)[-426.4275]LEGALVRRQAKEPCVESLVSQYFQTVTDYGKDLMEKVKSPELQAEAKSYFENFLSYFVELGTQPATQ.	8819.31	M_ACETYLATION		1	-426.4275:[5-15]	0		-	23	19	5.65456e-08	0	0
I:/Guijie/Corona480/S2_80cmCap_20cmSamp_8cmCathoHH_01_ms2.msalign	54	832	HCD	1459	1744.5	102	8	9007.41	9006.38	29	2.322e+07	18.3838	1739.77	1	tr|V9GYS1|V9GYS1_HUMAN	Apolipoprotein A-II OS=Homo sapiens OX=9606 GN=APOA2 PE=1 SV=1	1	82		MKLLAATVLLLTICSLEGALVRRQAKEPCVESLVSQYFQTVTDYGKDLMEKVKSPELQAEAKSYFENFLSYFVELGTQPATQ	.[Acetyl]-MKLLAATVLLLT(ICSLEGALVRRQAKEPCVESLVSQYFQTVTDYGKDLMEKVKSPELQAEAKSYFE)[-239.3603]NFLSYFVELGTQPATQ.	9006.38	M_ACETYLATION		1	-239.3603:[13-66]	0		-	30	22	2.19015e-08	0	0
I:/Guijie/Corona480/S2_80cmCap_20cmSamp_8cmCathoHH_01_ms2.msalign	57	837	HCD	1465	1749.74	69	5	4582.33	4583.3	5	1.943e+06	-441.523	1739.77	1	tr|V9GYJ8|V9GYJ8_HUMAN	Apolipoprotein C-II OS=Homo sapiens OX=9606 GN=APOC2 PE=3 SV=1	47	87		YWESAKTAAQNLDLYSKSTAAMSTYTGIFTDQVLSVLKGEE	S.(YWESAKTAAQN)[+67.1032]LDLYSKSTAAMSTYTGIFTDQVLSVLKGEE.	4583.3	NONE		1	+67.1032:[1-11]	0		-	24	21	1.62494398e-16	0	0
I:/Guijie/Corona480/S2_80cmCap_20cmSamp_8cmCathoHH_01_ms2.msalign	60	846	HCD	1476	1759.12	65	5	4150.17	4150.13	38	3.218e+06	-374.139	1751.6	5	sp|P05155|IC1_HUMAN	Plasma protease C1 inhibitor OS=Homo sapiens OX=9606 GN=SERPING1 PE=1 SV=2	467	500		TLLVFEVQQPFLFVLWDQQHKFPVFMGRVYDPRA	R.TLLVFEVQQPFLFVLWD(QQHK)[-0.0310]FPVFMGRVYDPRA.	4150.13	NONE		1	-0.0310:[18-21]	0		-	15	12	1.624768e-06	0	0
I:/Guijie/Corona480/S2_80cmCap_20cmSamp_8cmCathoHH_01_ms2.msalign	68	892	HCD	1529	1803.2	146	7	8774.13	8775.16	1	4.290e+08	22.5986	1646.22	2	sp|P02656|APOC3_HUMAN	Apolipoprotein C-III OS=Homo sapiens OX=9606 GN=APOC3 PE=1 SV=1	21	99		SEAEDASLLSFMQGYMKHATKTAKDALSSVQESQVAQQARGWVTDGFSSLKDYWSTVKDKFSEFWDLDPEVRPTSAVAA	A.SEAEDASLL(SFMQGYMKHATKTAKDA)[+15.9417]LSSVQESQVAQQARGWVTDGFSSLKDYWSTVKDKFSEFWDLDPEVRPTSAVAA.	8775.16	NONE		1	+15.9417:[10-26]	0		-	68	55	1.97735805e-23	0	0
I:/Guijie/Corona480/S2_80cmCap_20cmSamp_8cmCathoHH_01_ms2.msalign	71	902	HCD	1541	1813.22	39	9	9377.31	9376.35	62	1.829e+08	0.0657248	1804.27	1	tr|A0A087WW49|A0A087WW49_HUMAN	Ig-like domain-containing protein (Fragment) OS=Homo sapiens OX=9606 PE=4 SV=1	35	117		ETLSLTCVVSGGSISSSNWWSWVRQPPGKGLEWIGEIYHSGSPNYNPSLKSRVTISVDKSKNQFSLKLSSVTAADTAVYYCAR	S.ETLSLTCVVSGGSISSSNWWSWVRQPPGK(GLEWIGEIYHSGSPNYNPSLKSRVTIS)[+296.8119]VDKSKNQFSLKLSSVTAADTAVYYCAR.	9376.35	NONE		1	+296.8119:[30-56]	0		-	11	9	0.00303582	0	0
I:/Guijie/Corona480/S2_80cmCap_20cmSamp_8cmCathoHH_01_ms2.msalign	75	915	HCD	1556	1825.67	76	8	8820.32	8819.3	25	3.348e+09	53.8934	1722.3	2	sp|P02652|APOA2_HUMAN	Apolipoprotein A-II OS=Homo sapiens OX=9606 GN=APOA2 PE=1 SV=1	23	100		RQAKEPCVESLVSQYFQTVTDYGKDLMEKVKSPELQAEAKSYFEKSKEQLTPLIKKAGTELVNFLSYFVELGTQPATQ	R.RQAKEPCVE(SLVSQYFQTVTDYGKDLMEKVKSPELQAEAKSYFEKSKEQLTPL)[-39.2357]IKKAGTELVNFLSYFVELGTQPATQ.	8819.3	NONE		1	-39.2357:[10-53]	0		-	28	25	6.037808e-09	0	0
I:/Guijie/Corona480/S2_80cmCap_20cmSamp_8cmCathoHH_01_ms2.msalign	79	931	HCD	1575	1841.54	59	5	4466.2	4466.17	33	6.415e+06	-357.911	1833.39	1	sp|P02647|APOA1_HUMAN	Apolipoprotein A-I OS=Homo sapiens OX=9606 GN=APOA1 PE=1 SV=1	25	64		DEPPQSPWDRVKDLATVYVDVLKDSGRDYVSQFEGSALGK	Q.DEPPQSPWDRVKDLATVYVDVLK(DSGRDYVSQ)[-0.0348]FEGSALGK.Q	4466.17	NONE		1	-0.0348:[24-32]	0		-	20	18	2.19743004e-07	0	0
I:/Guijie/Corona480/S2_80cmCap_20cmSamp_8cmCathoHH_01_ms2.msalign	82	947	HCD	1593	1856.5	123	7	7398.75	7398.7	40	2.918e+07	28.4211	1722.3	4	sp|P02649|APOE_HUMAN	Apolipoprotein E OS=Homo sapiens OX=9606 GN=APOE PE=1 SV=1	19	79		KVEQAVETEPEPELRQQTEWQSGQRWELALGRFWDYLRWVQTLSEQVQEELLSSQVTQELR	A.KVEQAVETEPEPELRQQTEWQSGQRWELALGRFWDYLRWVQTLSEQVQEELLSSQVTQELR.A	7398.7	NONE		0		0		-	21	17	1.131939542e-05	0	0
I:/Guijie/Corona480/S2_80cmCap_20cmSamp_8cmCathoHH_01_ms2.msalign	83	952	HCD	1599	1861.55	99	8	8692.35	8692.26	36	1.013e+09	42.9702	1704.92	2	sp|P02652|APOA2_HUMAN	Apolipoprotein A-II OS=Homo sapiens OX=9606 GN=APOA2 PE=1 SV=1	23	99		RQAKEPCVESLVSQYFQTVTDYGKDLMEKVKSPELQAEAKSYFEKSKEQLTPLIKKAGTELVNFLSYFVELGTQPAT	R.RQAKEPCVESLV(SQYFQTVTDYGKDLMEKVKSPELQAEAKSYFEKSKEQLT)[-38.2186]PLIKKAGTELVNFLSYFVELGTQPAT.Q	8692.26	NONE		1	-38.2186:[13-51]	0		-	29	23	7.7104223e-07	0	0
I:/Guijie/Corona480/S2_80cmCap_20cmSamp_8cmCathoHH_01_ms2.msalign	89	964	HCD	1613	1873.17	112	7	8732.42	8732.3	37	2.351e+07	35.6993	1751.6	1	tr|V9GYS1|V9GYS1_HUMAN	Apolipoprotein A-II OS=Homo sapiens OX=9606 GN=APOA2 PE=1 SV=1	1	82		MKLLAATVLLLTICSLEGALVRRQAKEPCVESLVSQYFQTVTDYGKDLMEKVKSPELQAEAKSYFENFLSYFVELGTQPATQ	.(MKLLAATVLLLTICSLEGALVRRQAKEPCVESLVSQYFQTVTDYGKDL)[-471.4303]MEKVKSPELQAEAKSYFENFLSYFVELGTQPATQ.	8732.3	NONE		1	-471.4303:[1-48]	0		-	22	19	1.008952e-06	0	0
I:/Guijie/Corona480/S2_80cmCap_20cmSamp_8cmCathoHH_01_ms2.msalign	90	967	HCD	1617	1876.58	70	5	4305.27	4304.23	13	4.530e+06	-490.47	1868.42	3	sp|P02652|APOA2_HUMAN	Apolipoprotein A-II OS=Homo sapiens OX=9606 GN=APOA2 PE=1 SV=1	63	100		SYFEKSKEQLTPLIKKAGTELVNFLSYFVELGTQPATQ	K.(SYFEKSKEQLTPL)[-0.0303]IKKAGTELVNFLSYFVELGTQPATQ.	4304.23	NONE		1	-0.0303:[1-13]	0		-	25	20	3.5088837e-13	0	0
I:/Guijie/Corona480/S2_80cmCap_20cmSamp_8cmCathoHH_01_ms2.msalign	97	982	HCD	1634	1890.66	65	5	3934.93	3934.91	16	1.089e+07	6.37041	1885.93	8	tr|E5RGB0|E5RGB0_HUMAN	Clusterin (Fragment) OS=Homo sapiens OX=9606 GN=CLU PE=1 SV=1	23	57		DQTVSDNELQEMSNQGSKYVNKEIQNAVNGVKQIK	G.DQTVSDNELQEMSNQGSKYVNKE(IQN)[-0.0280]AVNGVKQIK.T	3934.91	NONE		1	-0.0280:[24-26]	0		-	25	19	8.61736656e-12	0	0
I:/Guijie/Corona480/S2_80cmCap_20cmSamp_8cmCathoHH_01_ms2.msalign	98	983	HCD	1635	1891.44	149	8	9415.4	9414.52	60	5.047e+08	16.8599	1775.08	2	sp|P02655|APOC2_HUMAN	Apolipoprotein C-II OS=Homo sapiens OX=9606 GN=APOC2 PE=1 SV=1	17	101		GFEVQGTQQPQQDEMPSPTFLTQVKESLSSYWESAKTAAQNLYEKTYLPAVDEKLRDLYSKSTAAMSTYTGIFTDQVLSVLKGEE	L.GFEVQGTQQPQQDEMPSPTFLTQVKESLSSYWESAKTAAQNLYEKTYLPAVDEKLRDLYSKSTAAMS(TYTGI)[-112.1345]FTDQVLSVLKGEE.	9414.52	NONE		1	-112.1345:[68-72]	0		-	23	20	0.00241335	0	0
I:/Guijie/Corona480/S2_80cmCap_20cmSamp_8cmCathoHH_01_ms2.msalign	99	984	HCD	1637	1893.28	137	7	8230.99	8229.98	26	2.921e+08	30.6588	1885.93	2	sp|P02655|APOC2_HUMAN	Apolipoprotein C-II OS=Homo sapiens OX=9606 GN=APOC2 PE=1 SV=1	31	101		MPSPTFLTQVKESLSSYWESAKTAAQNLYEKTYLPAVDEKLRDLYSKSTAAMSTYTGIFTDQVLSVLKGEE	E.MPSPTFLTQVKESLSSY(WESAKTAAQNLYEKTYLPAVDEKLRDLYSKSTAAMST)[+275.0039]YTGIFTDQVLSVLKGEE.	8229.98	NONE		1	+275.0039:[18-54]	0		-	40	29	1.47164912e-08	0	0
I:/Guijie/Corona480/S2_80cmCap_20cmSamp_8cmCathoHH_01_ms2.msalign	113	1058	HCD	1723	1964.88	61	5	3935.92	3935.89	9	4.340e+06	-384.936	1955.81	8	sp|P10909|CLUS_HUMAN	Clusterin OS=Homo sapiens OX=9606 GN=CLU PE=1 SV=1	23	57		DQTVSDNELQEMSNQGSKYVNKEIQNAVNGVKQIK	G.DQTVSDNELQEMSNQGSKYVNKEIQ(NAVN)[+0.9614]GVKQIK.T	3935.89	NONE		1	+0.9614:[26-29]	0		-	24	19	3.140783414e-14	0	0
I:/Guijie/Corona480/S2_80cmCap_20cmSamp_8cmCathoHH_01_ms2.msalign	125	1090	HCD	1760	1995.49	148	7	8910.41	8909.29	7	7.707e+07	25.4846	1885.93	2	sp|P02655|APOC2_HUMAN	Apolipoprotein C-II OS=Homo sapiens OX=9606 GN=APOC2 PE=1 SV=1	23	101		TQQPQQDEMPSPTFLTQVKESLSSYWESAKTAAQNLYEKTYLPAVDEKLRDLYSKSTAAMSTYTGIFTDQVLSVLKGEE	G.TQQPQQDEMPSPTFLTQV(KESLSSYWESAKTAAQNLYEKTYL)[-0.0926]PAVDEKLRDLYSKSTAAMSTYTGIFTDQVLSVLKGEE.	8909.29	NONE		1	-0.0926:[19-42]	0		-	44	37	2.47215212e-15	0	0
I:/Guijie/Corona480/S2_80cmCap_20cmSamp_8cmCathoHH_01_ms2.msalign	132	1106	HCD	1779	2011.35	148	7	8925.31	8925.33	2	2.473e+09	54.5547	1909.16	2	sp|P02655|APOC2_HUMAN	Apolipoprotein C-II OS=Homo sapiens OX=9606 GN=APOC2 PE=1 SV=1	23	101		TQQPQQDEMPSPTFLTQVKESLSSYWESAKTAAQNLYEKTYLPAVDEKLRDLYSKSTAAMSTYTGIFTDQVLSVLKGEE	G.TQQPQQDEMPSPTFLTQVKESLSSYWESAKTAAQNLYEKTYLPAVDEKLRDLYSKSTA(AM)[+15.9497]STYTGIFTDQVLSVLKGEE.	8925.33	NONE		1	+15.9497:[59-60]	0		-	61	48	2.70694819e-22	0	0
I:/Guijie/Corona480/S2_80cmCap_20cmSamp_8cmCathoHH_01_ms2.msalign	137	1131	HCD	1808	2035.7	78	5	4735.34	4735.31	15	2.565e+06	-365.985	2031.62	2	sp|P01024|CO3_HUMAN	Complement C3 OS=Homo sapiens OX=9606 GN=C3 PE=1 SV=2	23	65		SPMYSIITPNILRLESEETMVLEAHDAQGDVPVTVTVHDFPGK	G.SPMYSIITPNILRLESEETMV(LE)[-0.0441]AHDAQGDVPVTVTVHDFPGK.K	4735.31	NONE		1	-0.0441:[22-23]	0		-	29	24	1.249110896e-12	0	0
I:/Guijie/Corona480/S2_80cmCap_20cmSamp_8cmCathoHH_01_ms2.msalign	151	1172	HCD	1856	2075.64	149	7	8967.31	8967.29	28	3.161e+07	28.5017	2043.47	1	tr|V9GYJ8|V9GYJ8_HUMAN	Apolipoprotein C-II OS=Homo sapiens OX=9606 GN=APOC2 PE=3 SV=1	2	87		GTRLLPALFLVLLVLGFEVQGTQQPQQDEMPSPTFLTQVKESLSSYWESAKTAAQNLDLYSKSTAAMSTYTGIFTDQVLSVLKGEE	M.GTRLLPA(LFLVL)[-472.5188]LVLGFEVQGTQQPQQDEMPSPTFLTQVKESLSSYWESAKTAAQNLDLYSKSTAAMSTYTGIFTDQVLSVLKGEE.	8967.29	NME		1	-472.5188:[8-12]	0		-	34	27	2.017646e-08	0	0
I:/Guijie/Corona480/S2_80cmCap_20cmSamp_8cmCathoHH_01_ms2.msalign	164	1225	HCD	1918	2128.11	93	5	5699.8	5698.8	0	7.324e+06	31.7493	2137.43	3	sp|Q14624|ITIH4_HUMAN	Inter-alpha-trypsin inhibitor heavy chain H4 OS=Homo sapiens OX=9606 GN=ITIH4 PE=1 SV=4	439	487		RIHEDSDSALQLQDFYQEVANPLLTAVTFEYPSNAVEEVTQNNFRLLFK	R.RIHEDSDSALQLQDFYQEVANPLLTAVTFEYPSNAVEEVT(QNN)[-0.0234]FRLLFK.G	5698.8	NONE		1	-0.0234:[41-43]	0		-	34	32	1.047798768e-27	0	0
I:/Guijie/Corona480/S2_80cmCap_20cmSamp_8cmCathoHH_01_ms2.msalign	177	1264	HCD	1963	2165.65	149	7	8967.34	8967.28	10	3.161e+07	28.5017	2043.47	2	sp|P02655|APOC2_HUMAN	Apolipoprotein C-II OS=Homo sapiens OX=9606 GN=APOC2 PE=1 SV=1	23	101		TQQPQQDEMPSPTFLTQVKESLSSYWESAKTAAQNLYEKTYLPAVDEKLRDLYSKSTAAMSTYTGIFTDQVLSVLKGEE	G.TQQPQQDEMPSPTFLTQVKESLSSYWESAKTAAQNLYEKTYLPAVDEKLRDLYSKSTAAMS(TY)[+57.9055]TGIFTDQVLSVLKGEE.	8967.28	NONE		1	+57.9055:[62-63]	0		-	50	38	3.5640972e-14	0	0
I:/Guijie/Corona480/S2_80cmCap_20cmSamp_8cmCathoHH_01_ms2.msalign	180	1271	HCD	1971	2172.48	67	7	8982.44	8982.29	20	1.669e+08	47.1521	2049.26	2	sp|P02655|APOC2_HUMAN	Apolipoprotein C-II OS=Homo sapiens OX=9606 GN=APOC2 PE=1 SV=1	23	101		TQQPQQDEMPSPTFLTQVKESLSSYWESAKTAAQNLYEKTYLPAVDEKLRDLYSKSTAAMSTYTGIFTDQVLSVLKGEE	G.TQQPQQDEMPSPTFLTQVKESLSSYWESAKTAAQNLYEKTYLPAVDEKLRDLYSKSTAAMST(YT)[+72.9142]GIFTDQVLSVLKGEE.	8982.29	NONE		1	+72.9142:[63-64]	0		-	26	24	9.83050348e-10	0	0
I:/Guijie/Corona480/S2_80cmCap_20cmSamp_8cmCathoHH_01_ms2.msalign	203	1354	HCD	2068	2254.88	85	5	5133.52	5133.5	23	2.016e+06	-1000	2255.95	4	sp|P01024|CO3_HUMAN	Complement C3 OS=Homo sapiens OX=9606 GN=C3 PE=1 SV=2	955	1001		EGVQKEDIPPADLSDQVPDTESETRILLQGTPVAQMTEDAVDAERLK	R.EGVQKEDIPPADLSDQVPDTESETRILLQGT(PV)[-0.0349]AQMTEDAVDAERLK.H	5133.5	NONE		1	-0.0349:[32-33]	0		-	32	26	3.156783035e-09	0	0
I:/Guijie/Corona480/S2_80cmCap_20cmSamp_8cmCathoHH_01_ms2.msalign	207	1362	HCD	2078	2263.6	81	5	5132.53	5133.5	4	2.016e+06	-1000	2255.95	4	tr|A0A8Q3SI05|A0A8Q3SI05_HUMAN	Complement C3 (Fragment) OS=Homo sapiens OX=9606 GN=C3 PE=1 SV=1	663	709		EGVQKEDIPPADLSDQVPDTESETRILLQGTPVAQMTEDAVDAERLK	R.EGVQKEDIPPADLSDQVPDTESETRILLQGT(PVAQMTEDAV)[-0.0326]DAERLK.H	5133.5	NONE		1	-0.0326:[32-41]	0		-	31	27	4.47928596e-19	0	0
I:/Guijie/Corona480/S2_80cmCap_20cmSamp_8cmCathoHH_01_ms2.msalign	213	1383	HCD	2102	2283.95	140	7	8982.34	8983.29	42	1.669e+08	47.1521	2049.26	1	tr|V9GYJ8|V9GYJ8_HUMAN	Apolipoprotein C-II OS=Homo sapiens OX=9606 GN=APOC2 PE=3 SV=1	2	87		GTRLLPALFLVLLVLGFEVQGTQQPQQDEMPSPTFLTQVKESLSSYWESAKTAAQNLDLYSKSTAAMSTYTGIFTDQVLSVLKGEE	M.[Acetyl]-GTR(LLPALFLVLLVLGFEV)[-498.5290]QGTQQPQQDEMPSPTFLTQVKESLSSYWESAKTAAQNLDLYSKSTAAMSTYTGIFTDQVLSVLKGEE.	8983.29	NME_ACETYLATION		1	-498.5290:[4-19]	0		-	21	18	2.01894e-05	0	0
I:/Guijie/Corona480/S2_80cmCap_20cmSamp_8cmCathoHH_01_ms2.msalign	225	1461	HCD	2193	2361.22	67	5	4064.99	4064.94	21	8.170e+07	12.2098	2368.98	1	sp|P02649|APOE_HUMAN	Apolipoprotein E OS=Homo sapiens OX=9606 GN=APOE PE=1 SV=1	281	317		SWFEPLVEDMQRQWAGLVEKVQAAVGTSAAPVPSDNH	K.SWFEPLVEDMQRQ(W)[+15.9697]AGLVEKVQAAVGTSAAPVPSDNH.	4064.94	NONE		1	+15.9697:[14]	0		-	15	14	2.32352302e-09	0	0
I:/Guijie/Corona480/S2_80cmCap_20cmSamp_8cmCathoHH_01_ms2.msalign	242	1602	HCD	2358	2500.55	46	7	9888.71	9887.79	61	1.588e+06	-1000	2498.95	1	sp|P07437|TBB5_HUMAN	Tubulin beta chain OS=Homo sapiens OX=9606 GN=TUBB PE=1 SV=2	1	89		MREIVHIQAGQCGNQIGAKFWEVISDEHGIDPTGTYHGDSDLQLDRISVYYNEATGGKYVPRAILVDLEPGTMDSVRSGPFGQIFRPDN	.[Acetyl]-MREIVHIQAGQCGNQIGAKFWEVISDEHGIDPTGTYHGDSDLQLDRISVYYNEATGGKYVPRAILVDLEPGTMDSVRSGPFGQIFRPDN.F	9887.79	M_ACETYLATION		0		0		-	9	6	0.0029424	0	0
I:/Guijie/Corona480/S2_80cmCap_20cmSamp_8cmCathoHH_01_ms2.msalign	248	1656	HCD	2421	2554.33	113	6	6790.23	6791.26	58	1.576e+08	28.2957	2445.6	2	sp|P02656|APOC3_HUMAN	Apolipoprotein C-III OS=Homo sapiens OX=9606 GN=APOC3 PE=1 SV=1	40	99		TKTAKDALSSVQESQVAQQARGWVTDGFSSLKDYWSTVKDKFSEFWDLDPEVRPTSAVAA	A.TKTAKDALSSVQESQVAQQARGWVT(DGFSSLKDYW)[+127.9776]STVKDKFSEFWDLDPEVRPTSAVAA.	6791.26	NONE		1	+127.9776:[26-35]	0		-	18	16	0.00167443	0	0
I:/Guijie/Corona480/S2_80cmCap_20cmSamp_8cmCathoHH_01_ms2.msalign	257	1746	HCD	2526	2644.12	144	7	8939.34	8940.28	11	4.085e+09	49.8627	1920.76	2	sp|P02655|APOC2_HUMAN	Apolipoprotein C-II OS=Homo sapiens OX=9606 GN=APOC2 PE=1 SV=1	23	101		TQQPQQDEMPSPTFLTQVKESLSSYWESAKTAAQNLYEKTYLPAVDEKLRDLYSKSTAAMSTYTGIFTDQVLSVLKGEE	G.TQQPQQDEMPSPTFLTQVKESLSSYWESAKTA(AQNLYEKTYLPAVDEKLRDLYSKSTAAM)[+30.9051]STYTGIFTDQVLSVLKGEE.	8940.28	NONE		1	+30.9051:[33-60]	0		-	37	31	9.4130998e-14	0	0
I:/Guijie/Corona480/S2_80cmCap_20cmSamp_8cmCathoHH_01_ms2.msalign	260	1759	HCD	2541	2656.85	81	5	5198.47	5197.47	14	1.466e+06	-1000	2654.45	3	tr|H7C0L5|H7C0L5_HUMAN	Inter-alpha-trypsin inhibitor heavy chain 4 (Fragment) OS=Homo sapiens OX=9606 GN=ITIH4 PE=1 SV=1	297	341		RIHEDSDSALQLQDFYQEVANPLLTAVTFEYPSNAVEEVTQNNFR	R.(RIHEDSDSALQ)[-0.0229]LQDFYQEVANPLLTAVTFEYPSNAVEEVTQNNFR.L	5197.47	NONE		1	-0.0229:[1-11]	0		-	25	20	6.359916e-13	0	0
I:/Guijie/Corona480/S2_80cmCap_20cmSamp_8cmCathoHH_01_ms2.msalign	263	1787	HCD	2573	2684.11	25	2	1535.7	1535.67	54	2.183e+07	54.9479	2678.29	1	sp|P02671|FIBA_HUMAN	Fibrinogen alpha chain OS=Homo sapiens OX=9606 GN=FGA PE=1 SV=2	20	35		ADSGEGDFLAEGGGVR	T.ADSGEG(D)[-0.0125]FLAEGGGVR.G	1535.67	NONE		1	-0.0125:[7]	0		-	15	13	0.000533084	0	0
I:/Guijie/Corona480/S2_80cmCap_20cmSamp_8cmCathoHH_01_ms2.msalign	284	2080	HCD	2915	2979.65	87	7	8942.36	8941.28	18	4.085e+09	49.8627	1920.76	1	tr|V9GYJ8|V9GYJ8_HUMAN	Apolipoprotein C-II OS=Homo sapiens OX=9606 GN=APOC2 PE=3 SV=1	2	87		GTRLLPALFLVLLVLGFEVQGTQQPQQDEMPSPTFLTQVKESLSSYWESAKTAAQNLDLYSKSTAAMSTYTGIFTDQVLSVLKGEE	M.(GTRLLPALFLVLLV)[-498.5331]LGFEVQGTQQPQQDEMPSPTFLTQVKESLSSYWESAKTAAQNLDLYSKSTAAMSTYTGIFTDQVLSVLKGEE.	8941.28	NME		1	-498.5331:[1-14]	0		-	24	22	2.81306e-10	0	0
I:/Guijie/Corona480/S2_80cmCap_20cmSamp_8cmCathoHH_01_ms2.msalign	305	2410	HCD	3331	3352.56	38	3	2476.23	2476.19	19	1.935e+07	-182.304	3374.01	3	tr|V9GYJ8|V9GYJ8_HUMAN	Apolipoprotein C-II OS=Homo sapiens OX=9606 GN=APOC2 PE=3 SV=1	62	87		SKSTAAMSTYTGIFTDQVLSVLKGEE	Y.(SKSTAAMSTY)[-286.1739]TGIFTDQVLSVLKGEE.	2476.19	NONE		1	-286.1739:[1-10]	0		-	22	20	7.44539814e-10	0	0
I:/Guijie/Corona480/S2_80cmCap_20cmSamp_8cmCathoHH_01_ms2.msalign	309	2431	HCD	3357	3375.64	33	3	2476.23	2476.19	39	1.935e+07	-182.304	3374.01	3	sp|P02655|APOC2_HUMAN	Apolipoprotein C-II OS=Homo sapiens OX=9606 GN=APOC2 PE=1 SV=1	76	101		SKSTAAMSTYTGIFTDQVLSVLKGEE	Y.(SKSTAAMSTYTGI)[-286.1804]FTDQVLSVLKGEE.	2476.19	NONE		1	-286.1804:[1-13]	0		-	18	15	2.70259458e-06	0	0

## Sheet: Proteoform ID_run2
********************** Parameters **********************
Protein database file:	I:/Guijie/database_TDP_corona.fasta
Spectrum file:	I:/Guijie/Corona480/S2_80cmCap_20cmSamp_8cmCathoHH_02_ms2.msalign
Number of combined spectra:	1
Fragmentation method:	FILE
Search type:	TARGET+DECOY
Allowed N-terminal forms:	NONE,NME,NME_ACETYLATION,M_ACETYLATION
Maximum number of unexpected modifications:	1
Maximum mass shift of modifications:	500 Da
Minimum mass shift of modifications:	-500 Da
Spectrum-level cutoff type:	FDR
Spectrum-level cutoff value:	0.01
Proteoform-level cutoff type:	FDR
Proteoform-level cutoff value:	0.01
Error tolerance for matching masses:	10 ppm
Error tolerance for identifying PrSM clusters:	1.2 Da
Use TopFD feature file:	TRUE
E-value computation:	Generating function
Localization with MIScore:	FALSE
Thread number:	5
Executable file directory:	F:\software\toppic-windows-1.6.2\toppic-windows-1.6.2
Start time:	Thu Jan 11 14:10:04 2024
End time:	Thu Jan 11 14:26:44 2024
Version:	1.6.2
********************** Parameters **********************
Data file name	Prsm ID	Spectrum ID	Fragmentation	Scan(s)	Retention time	#peaks	Charge	Precursor mass	Adjusted precursor mass	Proteoform ID	Feature intensity	Feature score	Feature apex time	#Protein hits	Protein accession	Protein description	First residue	Last residue	Special amino acids	Database protein sequence	Proteoform	Proteoform mass	Protein N-terminal form	Fixed PTMs	#unexpected modifications	unexpected modifications	#variable PTMs	variable PTMs	MIScore	#matched peaks	#matched fragment ions	E-value	Spectrum-level Q-value	Proteoform-level Q-value
I:/Guijie/Corona480/S2_80cmCap_20cmSamp_8cmCathoHH_02_ms2.msalign	0	343	HCD	909	1316.4	127	5	7636.62	7636.77	60	2.651e+06	-59.5188	1427.53	4	tr|H7C013|H7C013_HUMAN	Albumin (Fragment) OS=Homo sapiens OX=9606 GN=ALB PE=1 SV=1	27	91		DAHKSEVAHRFKDLGEENFKALVLIAFAQYLQQCPFEDHVKLVNEVTEFAKTCVADESAENCDKS	R.DAHKSEVAHRFKDLGEENFKALVLIAFAQY(LQQCPFEDHVKLVNEVTEFAKTCVADESAENCDKS)[+283.2191].L	7636.77	NONE		1	+283.2191:[31-65]	0		-	19	13	0.000826804	0	0
I:/Guijie/Corona480/S2_80cmCap_20cmSamp_8cmCathoHH_02_ms2.msalign	1	344	HCD	910	1317.18	135	5	8111.68	8112.77	38	1.796e+06	-1000	1345.24	4	sp|P02768|ALBU_HUMAN	Albumin OS=Homo sapiens OX=9606 GN=ALB PE=1 SV=2	25	98		DAHKSEVAHRFKDLGEENFKALVLIAFAQYLQQCPFEDHVKLVNEVTEFAKTCVADESAENCDKSLHTLFGDKL	R.DAHKSEVAHRFKDLGEENFKALVLIAFAQYLQQCPFEDHV(KLVNEVTEFAKTCVADESAENCDKSLHTLFG)[-265.3447]DKL.C	8112.77	NONE		1	-265.3447:[41-71]	0		-	22	16	1.277054294e-06	0	0
I:/Guijie/Corona480/S2_80cmCap_20cmSamp_8cmCathoHH_02_ms2.msalign	2	572	HCD	1179	1542.25	89	16	11675.4	11675.5	45	1.338e+09	-39.0423	1531.73	1	sp|P0DJI8|SAA1_HUMAN	Serum amyloid A-1 protein OS=Homo sapiens OX=9606 GN=SAA1 PE=1 SV=1	19	122		RSFFSFLGEAFDGARDMWRAYSDMREANYIGSDKYFHARGNYDAAKRGPGGVWAAEAISDARENIQRFFGHGAEDSLADQAANEWGRSGKDPNHFRPAGLPEKY	S.RSFFSFLGEAFDGARDMWRAYSDMREANYIGSDKYFHARGNYDAAKRGPGGVWAAEAISDARENIQRFFGHGAEDSLADQAANEWGRSGKDPNHFRPAGLPEKY.	11675.5	NONE		0		0		-	14	14	4.45464e-06	0	0
I:/Guijie/Corona480/S2_80cmCap_20cmSamp_8cmCathoHH_02_ms2.msalign	5	587	HCD	1197	1557.28	54	13	11432.3	11431.2	61	5.486e+08	29.5708	1554.94	1	tr|E9PQD6|E9PQD6_HUMAN	Serum amyloid A protein OS=Homo sapiens OX=9606 GN=SAA1 PE=1 SV=1	21	122		FFSFLGEAFDGARDMWRAYSDMREANYIGSDKYFHARGNYDAAKRGPGGAWAAEVITDARENIQRFFGHGAEDSLADQAANEWGRSGKDPNHFRPAGLPEKY	S.FFSFLGEAFDGARDMWRAYSDMREANYIGSDKYFHARGNYDAAKRGPGGAWAAEVITDARE(NIQRFFGHGAEDSL)[-15.1347]ADQAANEWGRSGKDPNHFRPAGLPEKY.	11431.2	NONE		1	-15.1347:[62-75]	0		-	13	11	0.000889106	0	0
I:/Guijie/Corona480/S2_80cmCap_20cmSamp_8cmCathoHH_02_ms2.msalign	6	588	HCD	1198	1558.07	148	13	11521.3	11520.3	48	2.011e+09	29.3999	1554.94	1	tr|E9PQD6|E9PQD6_HUMAN	Serum amyloid A protein OS=Homo sapiens OX=9606 GN=SAA1 PE=1 SV=1	20	122		SFFSFLGEAFDGARDMWRAYSDMREANYIGSDKYFHARGNYDAAKRGPGGAWAAEVITDARENIQRFFGHGAEDSLADQAANEWGRSGKDPNHFRPAGLPEKY	R.SFFSFLGEAFDGARDMWRAYSDMREANYIGSDKYFHARGNYDAAKRGPGGAWA(AEVITDARENIQRFFGHGA)[-13.1297]EDSLADQAANEWGRSGKDPNHFRPAGLPEKY.	11520.3	NONE		1	-13.1297:[54-72]	0		-	24	20	2.18925877e-05	0	0
I:/Guijie/Corona480/S2_80cmCap_20cmSamp_8cmCathoHH_02_ms2.msalign	10	595	HCD	1206	1564.68	178	16	11519.4	11519.4	37	2.011e+09	29.3999	1554.94	1	sp|P0DJI8|SAA1_HUMAN	Serum amyloid A-1 protein OS=Homo sapiens OX=9606 GN=SAA1 PE=1 SV=1	20	122		SFFSFLGEAFDGARDMWRAYSDMREANYIGSDKYFHARGNYDAAKRGPGGVWAAEAISDARENIQRFFGHGAEDSLADQAANEWGRSGKDPNHFRPAGLPEKY	R.SFFSFLGEAFDGARDMWRAYSDMREANYIGSDKYFHARGNYDAAKRGPGGVWAAEAISDARENIQRFFGHGAEDSLADQAANEWGRSGKDPNHFRPAGLPEKY.	11519.4	NONE		0		0		-	20	19	1.10785e-06	0	0
I:/Guijie/Corona480/S2_80cmCap_20cmSamp_8cmCathoHH_02_ms2.msalign	13	599	HCD	1211	1568.88	89	14	11532.4	11533.3	33	5.489e+08	25.1825	1554.94	1	sp|P0DJI8|SAA1_HUMAN	Serum amyloid A-1 protein OS=Homo sapiens OX=9606 GN=SAA1 PE=1 SV=1	20	122		SFFSFLGEAFDGARDMWRAYSDMREANYIGSDKYFHARGNYDAAKRGPGGVWAAEAISDARENIQRFFGHGAEDSLADQAANEWGRSGKDPNHFRPAGLPEKY	R.SFFSFLGEAFDGARDMWRAYSDMREANYIGSDKYFHARGNYDAAKRGPGGV(WAAEAISDARENIQRFFGHGAEDS)[+13.8877]LADQAANEWGRSGKDPNHFRPAGLPEKY.	11533.3	NONE		1	+13.8877:[52-75]	0		-	19	18	2.9045384e-07	0	0
I:/Guijie/Corona480/S2_80cmCap_20cmSamp_8cmCathoHH_02_ms2.msalign	14	600	HCD	1212	1569.66	53	15	11449.4	11449.4	57	1.338e+08	-6.2901	1554.94	1	sp|P0DJI8|SAA1_HUMAN	Serum amyloid A-1 protein OS=Homo sapiens OX=9606 GN=SAA1 PE=1 SV=1	21	122		FFSFLGEAFDGARDMWRAYSDMREANYIGSDKYFHARGNYDAAKRGPGGVWAAEAISDARENIQRFFGHGAEDSLADQAANEWGRSGKDPNHFRPAGLPEKY	S.FFSFLGEAFDGARDMWRAYSD(MREANYIGSDKYFHARGNYDAAKRGPGGVWAAEAISDARENIQRFFGHGAEDSL)[+16.9999]ADQAANEWGRSGKDPNHFRPAGLPEKY.	11449.4	NONE		1	+16.9999:[22-75]	0		-	11	11	0.000166783	0	0
I:/Guijie/Corona480/S2_80cmCap_20cmSamp_8cmCathoHH_02_ms2.msalign	16	615	HCD	1229	1583.87	209	13	12571.1	12571.2	51	7.677e+05	-1000	1572.53	2	sp|P02647|APOA1_HUMAN	Apolipoprotein A-I OS=Homo sapiens OX=9606 GN=APOA1 PE=1 SV=1	158	267		LHELQEKLSPLGEEMRDRARAHVDALRTHLAPYSDELRQRLAARLEALKENGGARLAEYHAKATEHLSTLSEKAKPALEDLRQGLLPVLESFKVSFLSALEEYTKKLNTQ	K.LHEL(QEKL)[+119.5774]SPLGEEMRDRARAHVDALRTHLAPYSDELRQRLAARLEALKENGGARLAEYHAKATEHLSTLSEKAKPALEDLRQGLLPVLESFKVSFLSALEEYTKKLNTQ.	12571.2	NONE		1	+119.5774:[5-8]	0		-	21	18	5.89150214e-05	0	0
I:/Guijie/Corona480/S2_80cmCap_20cmSamp_8cmCathoHH_02_ms2.msalign	17	616	HCD	1231	1585.72	75	8	6185.34	6184.27	2	2.791e+07	-116.957	1578.36	2	tr|F8W696|F8W696_HUMAN	Apolipoprotein A1 OS=Homo sapiens OX=9606 GN=APOA1 PE=1 SV=1	191	245		LAEYHAKATEHLSTLSEKAKPALEDLRQGLLPVLESFKVSFLSALEEYTKKLNTQ	R.LAEYHAKATEHLSTLSEKAK(PAL)[-0.0420]EDLRQGLLPVLESFKVSFLSALEEYTKKLNTQ.	6184.27	NONE		1	-0.0420:[21-23]	0		-	37	27	8.2731016e-21	0	0
I:/Guijie/Corona480/S2_80cmCap_20cmSamp_8cmCathoHH_02_ms2.msalign	18	622	HCD	1238	1591.53	90	8	6183.32	6184.27	7	2.791e+07	-116.957	1578.36	2	sp|P02647|APOA1_HUMAN	Apolipoprotein A-I OS=Homo sapiens OX=9606 GN=APOA1 PE=1 SV=1	213	267		LAEYHAKATEHLSTLSEKAKPALEDLRQGLLPVLESFKVSFLSALEEYTKKLNTQ	R.LAEYHAKATEHLSTLSEKAKPALEDLRQGLLPVLE(SFKVS)[-0.0444]FLSALEEYTKKLNTQ.	6184.27	NONE		1	-0.0444:[36-40]	0		-	24	22	3.24151058e-12	0	0
I:/Guijie/Corona480/S2_80cmCap_20cmSamp_8cmCathoHH_02_ms2.msalign	20	647	HCD	1267	1615.78	96	12	11055.6	11056.5	13	1.353e+07	-92.0961	1554.94	1	sp|P02647|APOA1_HUMAN	Apolipoprotein A-I OS=Homo sapiens OX=9606 GN=APOA1 PE=1 SV=1	25	121		DEPPQSPWDRVKDLATVYVDVLKDSGRDYVSQFEGSALGKQLNLKLLDNWDSVTSTFSKLREQLGPVTQEFWDNLEKETEGLRQEMSKDLEEVKAKV	Q.DEPPQSPWDRVKDLATVYVDVLKDSGRDYVSQFEGSALGKQLNLKLLDNWDSVTSTFSKLREQLGPVTQEF(WDNLEKETEGLRQEMSKDLE)[-83.1319]EVKAKV.Q	11056.5	NONE		1	-83.1319:[72-91]	0		-	27	25	8.05661016e-10	0	0
I:/Guijie/Corona480/S2_80cmCap_20cmSamp_8cmCathoHH_02_ms2.msalign	21	699	HCD	1327	1666.24	318	23	20803.6	20804.9	59	6.598e+05	-1000	1654.48	2	sp|P02647|APOA1_HUMAN	Apolipoprotein A-I OS=Homo sapiens OX=9606 GN=APOA1 PE=1 SV=1	87	267		QLGPVTQEFWDNLEKETEGLRQEMSKDLEEVKAKVQPYLDDFQKKWQEEMELYRQKVEPLRAELQEGARQKLHELQEKLSPLGEEMRDRARAHVDALRTHLAPYSDELRQRLAARLEALKENGGARLAEYHAKATEHLSTLSEKAKPALEDLRQGLLPVLESFKVSFLSALEEYTKKLNTQ	E.(QLGPVTQE)[-220.0486]FWDNLEKETEGLRQEMSKDLEEVKAKVQPYLDDFQKKWQEEMELYRQKVEPLRAELQEGARQKLHELQEKLSPLGEEMRDRARAHVDALRTHLAPYSDELRQRLAARLEALKENGGARLAEYHAKATEHLSTLSEKAKPALEDLRQGLLPVLESFKVSFLSALEEYTKKLNTQ.	20804.9	NONE		1	-220.0486:[1-8]	0		-	28	27	0.000768585	0	0
I:/Guijie/Corona480/S2_80cmCap_20cmSamp_8cmCathoHH_02_ms2.msalign	22	701	HCD	1330	1668.87	155	14	13871.9	13870.8	55	6.613e+07	23.4246	1660.48	1	sp|P02766|TTHY_HUMAN	Transthyretin OS=Homo sapiens OX=9606 GN=TTR PE=1 SV=1	20	147		AGPTGTGESKCPLMVKVLDAVRGSPAINVAVHVFRKAADDTWEPFASGKTSESGELHGLTTEEEFVEGIYKVEIDTKSYWKALGISPFHEHAEVVFTANDSGPRRYTIAALLSPYSYSTTAVVTNPKE	E.AGPTGTGESKCPLMVKVLDA(VRGSPAINVAVHVFRKAADDTWEPFASGKTSESGELHGLTTEE)[+46.8305]EFVEGIYKVEIDTKSYWKALGISPFHEHAEVVFTANDSGPRRYTIAALLSPYSYSTTAVVTNPKE.	13870.8	NONE		1	+46.8305:[21-63]	0		-	21	19	0.000106677	0	0
I:/Guijie/Corona480/S2_80cmCap_20cmSamp_8cmCathoHH_02_ms2.msalign	23	704	HCD	1333	1671.35	83	7	5371.89	5371.86	5	8.922e+06	-1000	1666.52	2	sp|P02647|APOA1_HUMAN	Apolipoprotein A-I OS=Homo sapiens OX=9606 GN=APOA1 PE=1 SV=1	220	267		ATEHLSTLSEKAKPALEDLRQGLLPVLESFKVSFLSALEEYTKKLNTQ	K.ATEHLSTLSEKAKPALEDLRQGLLPVLESFKV(S)[-0.0328]FLSALEEYTKKLNTQ.	5371.86	NONE		1	-0.0328:[33]	0		-	31	28	2.15792462e-16	0	0
I:/Guijie/Corona480/S2_80cmCap_20cmSamp_8cmCathoHH_02_ms2.msalign	25	768	HCD	1408	1734.75	357	29	25471.5	25470.4	30	4.456e+06	-1000	1654.48	1	sp|P02647|APOA1_HUMAN	Apolipoprotein A-I OS=Homo sapiens OX=9606 GN=APOA1 PE=1 SV=1	50	267		GRDYVSQFEGSALGKQLNLKLLDNWDSVTSTFSKLREQLGPVTQEFWDNLEKETEGLRQEMSKDLEEVKAKVQPYLDDFQKKWQEEMELYRQKVEPLRAELQEGARQKLHELQEKLSPLGEEMRDRARAHVDALRTHLAPYSDELRQRLAARLEALKENGGARLAEYHAKATEHLSTLSEKAKPALEDLRQGLLPVLESFKVSFLSALEEYTKKLNTQ	S.GRDYVSQFEGSALGKQLNLKLLDNWDSVTSTFSKLREQLG(PVTQEF)[+262.3216]WDNLEKETEGLRQEMSKDLEEVKAKVQPYLDDFQKKWQEEMELYRQKVEPLRAELQEGARQKLHELQEKLSPLGEEMRDRARAHVDALRTHLAPYSDELRQRLAARLEALKENGGARLAEYHAKATEHLSTLSEKAKPALEDLRQGLLPVLESFKVSFLSALEEYTKKLNTQ.	25470.4	NONE		1	+262.3216:[41-46]	0		-	47	43	7.821525624e-08	0	0
I:/Guijie/Corona480/S2_80cmCap_20cmSamp_8cmCathoHH_02_ms2.msalign	26	778	HCD	1420	1745.01	65	5	4176.31	4175.26	3	1.796e+06	-702.022	1737.43	2	sp|P02647|APOA1_HUMAN	Apolipoprotein A-I OS=Homo sapiens OX=9606 GN=APOA1 PE=1 SV=1	231	267		AKPALEDLRQGLLPVLESFKVSFLSALEEYTKKLNTQ	K.AKPALEDLRQGLLPVLESFKVSFLSA(L)[-0.0248]EEYTKKLNTQ.	4175.26	NONE		1	-0.0248:[27]	0		-	27	21	9.15937707e-20	0	0
I:/Guijie/Corona480/S2_80cmCap_20cmSamp_8cmCathoHH_02_ms2.msalign	27	783	HCD	1425	1749	36	9	6626.52	6626.51	58	1.214e+08	-46.4909	1468.06	1	sp|P02654|APOC1_HUMAN	Apolipoprotein C-I OS=Homo sapiens OX=9606 GN=APOC1 PE=1 SV=1	27	83		TPDVSSALDKLKEFGNTLEDKARELISRIKQSELSAKMREWFSETFQKVKEKLKIDS	G.TPDVSSALDKLKEFGNTLEDKARELISRIKQSELSAKMREWFSETFQKVKEKLKIDS.	6626.51	NONE		0		0		-	6	6	0.000555086	0	0
I:/Guijie/Corona480/S2_80cmCap_20cmSamp_8cmCathoHH_02_ms2.msalign	31	864	HCD	1520	1827.73	133	8	8665.38	8666.32	26	3.175e+07	-101.457	1812.99	2	sp|P02652|APOA2_HUMAN	Apolipoprotein A-II OS=Homo sapiens OX=9606 GN=APOA2 PE=1 SV=1	27	100		EPCVESLVSQYFQTVTDYGKDLMEKVKSPELQAEAKSYFEKSKEQLTPLIKKAGTELVNFLSYFVELGTQPATQ	K.EPCVESLVS(QYFQTVTDYGKDLMEKVKSPELQAEAKSYFEKSKEQLT)[+291.0692]PLIKKAGTELVNFLSYFVELGTQPATQ.	8666.32	NONE		1	+291.0692:[10-47]	0		-	27	23	4.20110226e-08	0	0
I:/Guijie/Corona480/S2_80cmCap_20cmSamp_8cmCathoHH_02_ms2.msalign	32	869	HCD	1526	1832.74	144	8	8693.32	8692.27	50	4.300e+08	28.2789	1818.78	2	sp|P02652|APOA2_HUMAN	Apolipoprotein A-II OS=Homo sapiens OX=9606 GN=APOA2 PE=1 SV=1	25	99		AKEPCVESLVSQYFQTVTDYGKDLMEKVKSPELQAEAKSYFEKSKEQLTPLIKKAGTELVNFLSYFVELGTQPAT	Q.AKEPCVESLVSQ(YFQTVTDYGKDLMEKVKSPELQAEAKSYFEKSKEQLT)[+245.9475]PLIKKAGTELVNFLSYFVELGTQPAT.Q	8692.27	NONE		1	+245.9475:[13-49]	0		-	40	25	2.585924109e-05	0	0
I:/Guijie/Corona480/S2_80cmCap_20cmSamp_8cmCathoHH_02_ms2.msalign	40	901	HCD	1563	1863.73	150	8	9006.53	9006.39	29	1.166e+07	19.0084	1847.83	2	sp|P02652|APOA2_HUMAN	Apolipoprotein A-II OS=Homo sapiens OX=9606 GN=APOA2 PE=1 SV=1	23	100		RQAKEPCVESLVSQYFQTVTDYGKDLMEKVKSPELQAEAKSYFEKSKEQLTPLIKKAGTELVNFLSYFVELGTQPATQ	R.RQAKEPCVESLVSQ(YFQTVTDYGKDLMEKVKSPELQAEAKSYFEKSKEQLTPLI)[+147.8476]KKAGTELVNFLSYFVELGTQPATQ.	9006.39	NONE		1	+147.8476:[15-54]	0		-	36	25	6.64010784e-08	0	0
I:/Guijie/Corona480/S2_80cmCap_20cmSamp_8cmCathoHH_02_ms2.msalign	42	918	HCD	1583	1880.34	143	7	8734.34	8733.3	49	4.236e+06	-195.129	1865.58	1	tr|V9GYS1|V9GYS1_HUMAN	Apolipoprotein A-II OS=Homo sapiens OX=9606 GN=APOA2 PE=1 SV=1	1	82		MKLLAATVLLLTICSLEGALVRRQAKEPCVESLVSQYFQTVTDYGKDLMEKVKSPELQAEAKSYFENFLSYFVELGTQPATQ	.(MKLLAATVLLLTICSL)[-470.4292]EGALVRRQAKEPCVESLVSQYFQTVTDYGKDLMEKVKSPELQAEAKSYFENFLSYFVELGTQPATQ.	8733.3	NONE		1	-470.4292:[1-16]	0		-	21	18	2.5499e-05	0	0
I:/Guijie/Corona480/S2_80cmCap_20cmSamp_8cmCathoHH_02_ms2.msalign	51	1031	HCD	1715	1990.23	71	5	4303.27	4304.23	4	2.370e+06	-1000	1987.89	3	sp|P02652|APOA2_HUMAN	Apolipoprotein A-II OS=Homo sapiens OX=9606 GN=APOA2 PE=1 SV=1	63	100		SYFEKSKEQLTPLIKKAGTELVNFLSYFVELGTQPATQ	K.(SYFEKSKEQLT)[-0.0287]PLIKKAGTELVNFLSYFVELGTQPATQ.	4304.23	NONE		1	-0.0287:[1-11]	0		-	28	20	1.186544205e-17	0	0
I:/Guijie/Corona480/S2_80cmCap_20cmSamp_8cmCathoHH_02_ms2.msalign	55	1037	HCD	1722	1996.05	147	7	8926.46	8925.31	1	4.586e+06	-152.237	1993.7	2	sp|P02655|APOC2_HUMAN	Apolipoprotein C-II OS=Homo sapiens OX=9606 GN=APOC2 PE=1 SV=1	23	101		TQQPQQDEMPSPTFLTQVKESLSSYWESAKTAAQNLYEKTYLPAVDEKLRDLYSKSTAAMSTYTGIFTDQVLSVLKGEE	G.TQQPQQDEMPSPTFLTQVKESLSSYWESAKTAAQNLYEKTYLPAVDEKLRDLYSKSTA(AM)[+15.9349]STYTGIFTDQVLSVLKGEE.	8925.31	NONE		1	+15.9349:[59-60]	0		-	61	47	1.78723116e-22	0	0
I:/Guijie/Corona480/S2_80cmCap_20cmSamp_8cmCathoHH_02_ms2.msalign	59	1045	HCD	1731	2003.62	148	7	8909.33	8909.28	6	4.424e+07	17.4157	2028.77	2	sp|P02655|APOC2_HUMAN	Apolipoprotein C-II OS=Homo sapiens OX=9606 GN=APOC2 PE=1 SV=1	23	101		TQQPQQDEMPSPTFLTQVKESLSSYWESAKTAAQNLYEKTYLPAVDEKLRDLYSKSTAAMSTYTGIFTDQVLSVLKGEE	G.TQQPQQDEMPSPTFLTQV(KESLSSYWESAKTAAQNLYEKTYLPAVD)[-0.0943]EKLRDLYSKSTAAMSTYTGIFTDQVLSVLKGEE.	8909.28	NONE		1	-0.0943:[19-46]	0		-	48	38	1.57936429e-12	0	0
I:/Guijie/Corona480/S2_80cmCap_20cmSamp_8cmCathoHH_02_ms2.msalign	64	1051	HCD	1738	2009.47	131	7	8910.32	8909.28	28	4.424e+07	17.4157	2028.77	2	tr|K7ER74|K7ER74_HUMAN	Apolipoprotein C-II OS=Homo sapiens OX=9606 GN=APOC4-APOC2 PE=1 SV=1	100	178		TQQPQQDEMPSPTFLTQVKESLSSYWESAKTAAQNLYEKTYLPAVDEKLRDLYSKSTAAMSTYTGIFTDQVLSVLKGEE	G.TQQPQQDE(MPSPTFLTQVKESLSSYWESAKTAAQNLYEKTYLPAVDEKLRDLYSKSTA)[-0.0948]AMSTYTGIFTDQVLSVLKGEE.	8909.28	NONE		1	-0.0948:[9-58]	0		-	34	27	5.36042691e-08	0	0
I:/Guijie/Corona480/S2_80cmCap_20cmSamp_8cmCathoHH_02_ms2.msalign	66	1053	HCD	1740	2011.04	65	5	3934.91	3934.9	27	4.667e+06	14.3988	2069.48	8	tr|E5RGB0|E5RGB0_HUMAN	Clusterin (Fragment) OS=Homo sapiens OX=9606 GN=CLU PE=1 SV=1	23	57		DQTVSDNELQEMSNQGSKYVNKEIQNAVNGVKQIK	G.DQTVSDNELQEMSNQGSKYV(NKEIQNA)[-0.0309]VNGVKQIK.T	3934.9	NONE		1	-0.0309:[21-27]	0		-	21	16	4.86793888e-08	0	0
I:/Guijie/Corona480/S2_80cmCap_20cmSamp_8cmCathoHH_02_ms2.msalign	79	1094	HCD	1788	2050.88	145	8	8775.1	8774.11	18	1.343e+08	31.1957	2034.56	2	sp|P02656|APOC3_HUMAN	Apolipoprotein C-III OS=Homo sapiens OX=9606 GN=APOC3 PE=1 SV=1	21	99		SEAEDASLLSFMQGYMKHATKTAKDALSSVQESQVAQQARGWVTDGFSSLKDYWSTVKDKFSEFWDLDPEVRPTSAVAA	A.SEAEDASLLSFMQGYMKHATKTAKDALSSVQESQVAQQARGW(VTDGFSSLKD)[+14.8923]YWSTVKDKFSEFWDLDPEVRPTSAVAA.	8774.11	NONE		1	+14.8923:[43-52]	0		-	38	27	4.52857288e-09	0	0
I:/Guijie/Corona480/S2_80cmCap_20cmSamp_8cmCathoHH_02_ms2.msalign	80	1121	HCD	1820	2077.69	65	5	3934.9	3935.88	17	4.667e+06	14.3988	2069.48	8	sp|P10909|CLUS_HUMAN	Clusterin OS=Homo sapiens OX=9606 GN=CLU PE=1 SV=1	23	57		DQTVSDNELQEMSNQGSKYVNKEIQNAVNGVKQIK	G.DQTVSDNELQEMSNQGSKYV(NKEIQNAVN)[+0.9513]GVKQIK.T	3935.88	NONE		1	+0.9513:[21-29]	0		-	20	16	3.056765286e-09	0	0
I:/Guijie/Corona480/S2_80cmCap_20cmSamp_8cmCathoHH_02_ms2.msalign	86	1168	HCD	1875	2124.33	98	8	8877.4	8877.33	21	1.677e+07	20.319	2122.76	1	tr|V9GYS1|V9GYS1_HUMAN	Apolipoprotein A-II OS=Homo sapiens OX=9606 GN=APOA2 PE=1 SV=1	1	82		MKLLAATVLLLTICSLEGALVRRQAKEPCVESLVSQYFQTVTDYGKDLMEKVKSPELQAEAKSYFENFLSYFVELGTQPATQ	.[Acetyl]-MKLLAATVLLLTICSLEGALVRRQAKEPCVES(LVSQYFQTVTDYGKDLMEKVKSPELQAEAKSYFE)[-368.4097]NFLSYFVELGTQPATQ.	8877.33	M_ACETYLATION		1	-368.4097:[33-66]	0		-	29	22	1.134512e-08	0	0
I:/Guijie/Corona480/S2_80cmCap_20cmSamp_8cmCathoHH_02_ms2.msalign	89	1175	HCD	1883	2130.93	129	8	8805.37	8804.32	19	9.247e+06	-1000	2122.76	2	sp|P02652|APOA2_HUMAN	Apolipoprotein A-II OS=Homo sapiens OX=9606 GN=APOA2 PE=1 SV=1	25	100		AKEPCVESLVSQYFQTVTDYGKDLMEKVKSPELQAEAKSYFEKSKEQLTPLIKKAGTELVNFLSYFVELGTQPATQ	Q.AKEPCVE(SLVSQYFQTVTDYGKDLMEKVKSPELQAEAKSYFEKSK)[+229.9376]EQLTPLIKKAGTELVNFLSYFVELGTQPATQ.	8804.32	NONE		1	+229.9376:[8-45]	0		-	35	27	7.01206264e-09	0	0
I:/Guijie/Corona480/S2_80cmCap_20cmSamp_8cmCathoHH_02_ms2.msalign	92	1180	HCD	1889	2135.97	142	8	8878.42	8877.34	22	1.677e+07	20.319	2122.76	2	sp|P02652|APOA2_HUMAN	Apolipoprotein A-II OS=Homo sapiens OX=9606 GN=APOA2 PE=1 SV=1	23	100		RQAKEPCVESLVSQYFQTVTDYGKDLMEKVKSPELQAEAKSYFEKSKEQLTPLIKKAGTELVNFLSYFVELGTQPATQ	R.RQAKEPCVES(LVSQYFQTVTDYGKDLMEKVKSPELQAEAKSYFEKSKEQLT)[+18.8028]PLIKKAGTELVNFLSYFVELGTQPATQ.	8877.34	NONE		1	+18.8028:[11-51]	0		-	41	29	1.65766655e-08	0	0
I:/Guijie/Corona480/S2_80cmCap_20cmSamp_8cmCathoHH_02_ms2.msalign	93	1181	HCD	1890	2136.76	137	8	8540.39	8539.27	41	4.984e+06	-1000	2128.58	2	sp|P02652|APOA2_HUMAN	Apolipoprotein A-II OS=Homo sapiens OX=9606 GN=APOA2 PE=1 SV=1	24	99		QAKEPCVESLVSQYFQTVTDYGKDLMEKVKSPELQAEAKSYFEKSKEQLTPLIKKAGTELVNFLSYFVELGTQPAT	R.QAKEPCV(ESLVSQYFQTVTDYGKDLMEKVKSPELQAEAKSYFEKSK)[-35.1067]EQLTPLIKKAGTELVNFLSYFVELGTQPAT.Q	8539.27	NONE		1	-35.1067:[8-46]	0		-	34	25	2.135508347e-06	0	0
I:/Guijie/Corona480/S2_80cmCap_20cmSamp_8cmCathoHH_02_ms2.msalign	94	1182	HCD	1891	2137.54	68	7	8691.39	8692.25	24	9.341e+07	27.6571	2152.21	1	tr|V9GYS1|V9GYS1_HUMAN	Apolipoprotein A-II OS=Homo sapiens OX=9606 GN=APOA2 PE=1 SV=1	1	81		MKLLAATVLLLTICSLEGALVRRQAKEPCVESLVSQYFQTVTDYGKDLMEKVKSPELQAEAKSYFENFLSYFVELGTQPAT	.[Acetyl]-MKL(LAATVLLLTICSLEGALVRRQAKEPCVESLVSQYFQTVTDYG)[-425.4275]KDLMEKVKSPELQAEAKSYFENFLSYFVELGTQPAT.Q	8692.25	M_ACETYLATION		1	-425.4275:[4-45]	0		-	23	20	2.356899104e-08	0	0
I:/Guijie/Corona480/S2_80cmCap_20cmSamp_8cmCathoHH_02_ms2.msalign	96	1187	HCD	1897	2142.72	140	8	8804.39	8803.32	35	9.247e+06	-1000	2122.76	1	tr|V9GYS1|V9GYS1_HUMAN	Apolipoprotein A-II OS=Homo sapiens OX=9606 GN=APOA2 PE=1 SV=1	1	82		MKLLAATVLLLTICSLEGALVRRQAKEPCVESLVSQYFQTVTDYGKDLMEKVKSPELQAEAKSYFENFLSYFVELGTQPATQ	.[Acetyl]-MKL(LAATVLLLTICSL)[-442.4218]EGALVRRQAKEPCVESLVSQYFQTVTDYGKDLMEKVKSPELQAEAKSYFENFLSYFVELGTQPATQ.	8803.32	M_ACETYLATION		1	-442.4218:[4-16]	0		-	26	20	6.31712e-07	0	0
I:/Guijie/Corona480/S2_80cmCap_20cmSamp_8cmCathoHH_02_ms2.msalign	100	1193	HCD	1904	2148.7	116	8	8820.36	8820.31	31	2.526e+09	53.7735	1836.18	2	sp|P02652|APOA2_HUMAN	Apolipoprotein A-II OS=Homo sapiens OX=9606 GN=APOA2 PE=1 SV=1	25	100		AKEPCVESLVSQYFQTVTDYGKDLMEKVKSPELQAEAKSYFEKSKEQLTPLIKKAGTELVNFLSYFVELGTQPATQ	Q.AKEPCVESLVSQ(YFQTVTDYGKDLMEKVKSPELQAEAKSYFEKSKEQLT)[+245.9314]PLIKKAGTELVNFLSYFVELGTQPATQ.	8820.31	NONE		1	+245.9314:[13-49]	0		-	36	25	1.040624956e-07	0	0
I:/Guijie/Corona480/S2_80cmCap_20cmSamp_8cmCathoHH_02_ms2.msalign	101	1194	HCD	1905	2149.49	144	8	8666.47	8667.34	16	8.255e+06	-1000	2140.37	2	tr|V9GYM3|V9GYM3_HUMAN	Apolipoprotein A-II OS=Homo sapiens OX=9606 GN=APOA2 PE=1 SV=1	58	133		AKEPCVESLVSQYFQTVTDYGKDLMEKVKSPELQAEAKSYFEKSKEQLTPLIKKAGTELVNFLSYFVELGTQPATQ	Q.AKEPCVESLVSQ(YFQTVTDYGKDLMEKVKSPELQAEAKSYFEKSKEQLT)[+92.9591]PLIKKAGTELVNFLSYFVELGTQPATQ.	8667.34	NONE		1	+92.9591:[13-49]	0		-	41	29	1.83853735e-09	0	0
I:/Guijie/Corona480/S2_80cmCap_20cmSamp_8cmCathoHH_02_ms2.msalign	103	1199	HCD	1911	2154.56	103	8	8820.37	8820.31	20	2.526e+09	53.7735	1836.18	1	tr|V9GYS1|V9GYS1_HUMAN	Apolipoprotein A-II OS=Homo sapiens OX=9606 GN=APOA2 PE=1 SV=1	1	82		MKLLAATVLLLTICSLEGALVRRQAKEPCVESLVSQYFQTVTDYGKDLMEKVKSPELQAEAKSYFENFLSYFVELGTQPATQ	.[Acetyl]-MKLL(AATVLLLTICSLEGAL)[-425.4340]VRRQAKEPCVESLVSQYFQTVTDYGKDLMEKVKSPELQAEAKSYFENFLSYFVELGTQPATQ.	8820.31	M_ACETYLATION		1	-425.4340:[5-20]	0		-	31	22	1.06248e-08	0	0
I:/Guijie/Corona480/S2_80cmCap_20cmSamp_8cmCathoHH_02_ms2.msalign	106	1202	HCD	1914	2156.94	78	5	4735.35	4735.3	25	1.035e+06	-1000	2146.35	2	sp|P01024|CO3_HUMAN	Complement C3 OS=Homo sapiens OX=9606 GN=C3 PE=1 SV=2	23	65		SPMYSIITPNILRLESEETMVLEAHDAQGDVPVTVTVHDFPGK	G.SPMYSIITPNILRLESEETMVL(EAHDAQ)[-0.0490]GDVPVTVTVHDFPGK.K	4735.3	NONE		1	-0.0490:[23-28]	0		-	25	21	2.97372944e-08	0	0
I:/Guijie/Corona480/S2_80cmCap_20cmSamp_8cmCathoHH_02_ms2.msalign	125	1247	HCD	1967	2201.42	84	6	7397.64	7398.61	15	7.751e+06	-1000	2193.27	4	sp|P02649|APOE_HUMAN	Apolipoprotein E OS=Homo sapiens OX=9606 GN=APOE PE=1 SV=1	19	79		KVEQAVETEPEPELRQQTEWQSGQRWELALGRFWDYLRWVQTLSEQVQEELLSSQVTQELR	A.KVEQAVETEPEPE(LRQQTEWQSGQRWELALGRFWD)[-0.0835]YLRWVQTLSEQVQEELLSSQVTQELR.A	7398.61	NONE		1	-0.0835:[14-35]	0		-	34	30	1.555379552e-09	0	0
I:/Guijie/Corona480/S2_80cmCap_20cmSamp_8cmCathoHH_02_ms2.msalign	128	1263	HCD	1985	2216.41	121	7	8968.27	8968.28	52	3.700e+07	35.2151	2163.81	1	tr|V9GYJ8|V9GYJ8_HUMAN	Apolipoprotein C-II OS=Homo sapiens OX=9606 GN=APOC2 PE=3 SV=1	2	87		GTRLLPALFLVLLVLGFEVQGTQQPQQDEMPSPTFLTQVKESLSSYWESAKTAAQNLDLYSKSTAAMSTYTGIFTDQVLSVLKGEE	M.GTRLLPAL(FLVLLVLGFEVQGTQQPQQ)[-471.5265]DEMPSPTFLTQVKESLSSYWESAKTAAQNLDLYSKSTAAMSTYTGIFTDQVLSVLKGEE.	8968.28	NME		1	-471.5265:[9-27]	0		-	15	15	6.301392e-05	0	0
I:/Guijie/Corona480/S2_80cmCap_20cmSamp_8cmCathoHH_02_ms2.msalign	129	1272	HCD	1996	2225.65	145	7	8981.39	8982.28	36	2.012e+08	49.8284	2175.5	1	tr|V9GYJ8|V9GYJ8_HUMAN	Apolipoprotein C-II OS=Homo sapiens OX=9606 GN=APOC2 PE=3 SV=1	2	87		GTRLLPALFLVLLVLGFEVQGTQQPQQDEMPSPTFLTQVKESLSSYWESAKTAAQNLDLYSKSTAAMSTYTGIFTDQVLSVLKGEE	M.GTRLLPAL(FLVLLVLGFEVQGTQQPQQDEMPSPTFLTQVKESLSSY)[-457.5303]WESAKTAAQNLDLYSKSTAAMSTYTGIFTDQVLSVLKGEE.	8982.28	NME		1	-457.5303:[9-46]	0		-	22	19	7.99578e-07	0	0
I:/Guijie/Corona480/S2_80cmCap_20cmSamp_8cmCathoHH_02_ms2.msalign	130	1283	HCD	2009	2236.66	79	5	4892.37	4892.35	34	7.568e+05	-1000	2228.49	2	sp|P19827|ITIH1_HUMAN	Inter-alpha-trypsin inhibitor heavy chain H1 OS=Homo sapiens OX=9606 GN=ITIH1 PE=1 SV=3	596	640		MSLDYGFVTPLTSMSIRGMADQDGLKPTIDKPSEDSPPLEMLGPR	Q.MSLDYGFVTPLTSMSIRGMADQDGLKPTIDK(PSEDSPPLEMLGPR)[-0.0280].R	4892.35	NONE		1	-0.0280:[32-45]	0		-	24	17	4.79525886e-07	0	0
I:/Guijie/Corona480/S2_80cmCap_20cmSamp_8cmCathoHH_02_ms2.msalign	131	1303	HCD	2032	2256.01	76	5	5698.78	5698.8	40	1.694e+07	43.8031	2257.87	3	tr|H7C0L5|H7C0L5_HUMAN	Inter-alpha-trypsin inhibitor heavy chain 4 (Fragment) OS=Homo sapiens OX=9606 GN=ITIH4 PE=1 SV=1	297	345		RIHEDSDSALQLQDFYQEVANPLLTAVTFEYPSNAVEEVTQNNFRLLFK	R.(RIHEDSDSAL)[-0.0246]QLQDFYQEVANPLLTAVTFEYPSNAVEEVTQNNFRLLFK.G	5698.8	NONE		1	-0.0246:[1-10]	0		-	26	18	1.718644542e-06	0	0
I:/Guijie/Corona480/S2_80cmCap_20cmSamp_8cmCathoHH_02_ms2.msalign	132	1307	HCD	2037	2260.22	72	5	5698.77	5698.8	47	1.694e+07	43.8031	2257.87	3	sp|Q14624|ITIH4_HUMAN	Inter-alpha-trypsin inhibitor heavy chain H4 OS=Homo sapiens OX=9606 GN=ITIH4 PE=1 SV=4	439	487		RIHEDSDSALQLQDFYQEVANPLLTAVTFEYPSNAVEEVTQNNFRLLFK	R.(RIHEDSDSALQ)[-0.0251]LQDFYQEVANPLLTAVTFEYPSNAVEEVTQNNFRLLFK.G	5698.8	NONE		1	-0.0251:[1-11]	0		-	25	18	1.050827872e-05	0	0
I:/Guijie/Corona480/S2_80cmCap_20cmSamp_8cmCathoHH_02_ms2.msalign	134	1326	HCD	2059	2279.04	144	7	8941.39	8941.27	9	4.059e+09	50.8483	2034.56	2	sp|P02655|APOC2_HUMAN	Apolipoprotein C-II OS=Homo sapiens OX=9606 GN=APOC2 PE=1 SV=1	23	101		TQQPQQDEMPSPTFLTQVKESLSSYWESAKTAAQNLYEKTYLPAVDEKLRDLYSKSTAAMSTYTGIFTDQVLSVLKGEE	G.TQQPQQDEMPSPTFLTQVKESLSSYWESAKTAAQNLYEKTYLP(AVDEKLRDLYSKSTAAM)[+31.8927]STYTGIFTDQVLSVLKGEE.	8941.27	NONE		1	+31.8927:[44-60]	0		-	43	35	9.421308e-12	0	0
I:/Guijie/Corona480/S2_80cmCap_20cmSamp_8cmCathoHH_02_ms2.msalign	151	1400	HCD	2145	2352.21	136	7	8215	8213.95	11	4.867e+06	-1000	2347.24	2	sp|P02655|APOC2_HUMAN	Apolipoprotein C-II OS=Homo sapiens OX=9606 GN=APOC2 PE=1 SV=1	29	101		DEMPSPTFLTQVKESLSSYWESAKTAAQNLYEKTYLPAVDEKLRDLYSKSTAAMSTYTGIFTDQVLSVLKGEE	Q.DEMPSPTFLTQVKESLSSYWESAKTAAQNLYEK(TYLPAVDEKLRDLYSKSTAAMST)[+14.9020]YTGIFTDQVLSVLKGEE.	8213.95	NONE		1	+14.9020:[34-56]	0		-	39	32	1.446355716e-10	0	0
I:/Guijie/Corona480/S2_80cmCap_20cmSamp_8cmCathoHH_02_ms2.msalign	152	1401	HCD	2146	2353	82	7	8230.01	8230.95	54	1.381e+07	26.8888	2353.28	1	tr|V9GYJ8|V9GYJ8_HUMAN	Apolipoprotein C-II OS=Homo sapiens OX=9606 GN=APOC2 PE=3 SV=1	14	87		LVLGFEVQGTQQPQQDEMPSPTFLTQVKESLSSYWESAKTAAQNLDLYSKSTAAMSTYTGIFTDQVLSVLKGEE	L.LVLGFEVQGTQQPQQDEMPSPT(FLTQVKESLSSYWESAKTAAQNLDLYSKSTAAMST)[+84.9551]YTGIFTDQVLSVLKGEE.	8230.95	NONE		1	+84.9551:[23-57]	0		-	23	20	9.8889433e-05	0	0
I:/Guijie/Corona480/S2_80cmCap_20cmSamp_8cmCathoHH_02_ms2.msalign	154	1403	HCD	2149	2355.64	96	8	8232	8230.94	46	1.381e+07	26.8888	2353.28	2	sp|P02655|APOC2_HUMAN	Apolipoprotein C-II OS=Homo sapiens OX=9606 GN=APOC2 PE=1 SV=1	31	101		MPSPTFLTQVKESLSSYWESAKTAAQNLYEKTYLPAVDEKLRDLYSKSTAAMSTYTGIFTDQVLSVLKGEE	E.MPSPTFLTQVKESLSS(YWESAKTAAQNLYEKTYLPAVDEKLRDLYSKSTAAMSTYTG)[+275.9704]IFTDQVLSVLKGEE.	8230.94	NONE		1	+275.9704:[17-57]	0		-	26	19	6.7824324e-06	0	0
I:/Guijie/Corona480/S2_80cmCap_20cmSamp_8cmCathoHH_02_ms2.msalign	162	1425	HCD	2174	2376.49	85	5	5132.49	5133.5	0	5.936e+06	-982.676	2376.78	4	sp|P01024|CO3_HUMAN	Complement C3 OS=Homo sapiens OX=9606 GN=C3 PE=1 SV=2	955	1001		EGVQKEDIPPADLSDQVPDTESETRILLQGTPVAQMTEDAVDAERLK	R.EGVQKEDIPPADLSDQVPDTESETRILLQGTPV(AQMTEDAV)[-0.0343]DAERLK.H	5133.5	NONE		1	-0.0343:[34-41]	0		-	36	28	8.55184001e-23	0	0
I:/Guijie/Corona480/S2_80cmCap_20cmSamp_8cmCathoHH_02_ms2.msalign	169	1464	HCD	2220	2415.24	149	8	8942.39	8941.27	10	4.059e+09	50.8483	2034.56	1	tr|V9GYJ8|V9GYJ8_HUMAN	Apolipoprotein C-II OS=Homo sapiens OX=9606 GN=APOC2 PE=3 SV=1	2	87		GTRLLPALFLVLLVLGFEVQGTQQPQQDEMPSPTFLTQVKESLSSYWESAKTAAQNLDLYSKSTAAMSTYTGIFTDQVLSVLKGEE	M.GTRLLPA(LFLVLLVL)[-498.5352]GFEVQGTQQPQQDEMPSPTFLTQVKESLSSYWESAKTAAQNLDLYSKSTAAMSTYTGIFTDQVLSVLKGEE.	8941.27	NME		1	-498.5352:[8-15]	0		-	36	26	7.91114e-11	0	0
I:/Guijie/Corona480/S2_80cmCap_20cmSamp_8cmCathoHH_02_ms2.msalign	181	1566	HCD	2339	2516.35	67	5	4064.98	4064.94	23	1.287e+08	34.7545	2507.34	1	sp|P02649|APOE_HUMAN	Apolipoprotein E OS=Homo sapiens OX=9606 GN=APOE PE=1 SV=1	281	317		SWFEPLVEDMQRQWAGLVEKVQAAVGTSAAPVPSDNH	K.SWFEPLVEDMQRQ(W)[+15.9695]AGLVEKVQAAVGTSAAPVPSDNH.	4064.94	NONE		1	+15.9695:[14]	0		-	16	14	2.21651261e-08	0	0
I:/Guijie/Corona480/S2_80cmCap_20cmSamp_8cmCathoHH_02_ms2.msalign	188	1604	HCD	2383	2553.87	127	7	8966.4	8967.27	14	3.053e+06	-1000	2531.18	2	sp|P02655|APOC2_HUMAN	Apolipoprotein C-II OS=Homo sapiens OX=9606 GN=APOC2 PE=1 SV=1	23	101		TQQPQQDEMPSPTFLTQVKESLSSYWESAKTAAQNLYEKTYLPAVDEKLRDLYSKSTAAMSTYTGIFTDQVLSVLKGEE	G.TQQPQQDEMPSPTFLTQVKESLSSYWESAKTAAQNLYEKTYLPAVDEKLRDLYSKSTAAMS(TYT)[+57.8952]GIFTDQVLSVLKGEE.	8967.27	NONE		1	+57.8952:[62-64]	0		-	31	27	1.52245071e-09	0	0
I:/Guijie/Corona480/S2_80cmCap_20cmSamp_8cmCathoHH_02_ms2.msalign	191	1620	HCD	2402	2570.03	82	7	8982.41	8983.28	32	2.012e+08	49.8284	2175.5	2	sp|P02655|APOC2_HUMAN	Apolipoprotein C-II OS=Homo sapiens OX=9606 GN=APOC2 PE=1 SV=1	23	101		TQQPQQDEMPSPTFLTQVKESLSSYWESAKTAAQNLYEKTYLPAVDEKLRDLYSKSTAAMSTYTGIFTDQVLSVLKGEE	G.TQQPQQDEMPSPTFLTQVKESLSSYWESAKTAAQNLYEKTYLPAVDEKLRDLYSKSTAAMS(TY)[+73.8975]TGIFTDQVLSVLKGEE.	8983.28	NONE		1	+73.8975:[62-63]	0		-	25	22	1.27688184e-07	0	0
I:/Guijie/Corona480/S2_80cmCap_20cmSamp_8cmCathoHH_02_ms2.msalign	201	1834	HCD	2652	2783.88	20	2	1469.78	1469.76	56	4.098e+06	-346.146	2770.33	2	sp|P01024|CO3_HUMAN	Complement C3 OS=Homo sapiens OX=9606 GN=C3 PE=1 SV=2	291	304		IPIEDGSGEVVLSR	R.IPIED(G)[-0.0131]SGEVVLSR.K	1469.76	NONE		1	-0.0131:[6]	0		-	12	10	0.000121362	0	0
I:/Guijie/Corona480/S2_80cmCap_20cmSamp_8cmCathoHH_02_ms2.msalign	202	1874	HCD	2698	2822.8	20	2	1535.7	1535.67	42	3.878e+07	57.5121	2835.7	1	sp|P02671|FIBA_HUMAN	Fibrinogen alpha chain OS=Homo sapiens OX=9606 GN=FGA PE=1 SV=2	20	35		ADSGEGDFLAEGGGVR	T.ADSGEGD(FL)[-0.0147]AEGGGVR.G	1535.67	NONE		1	-0.0147:[8-9]	0		-	14	13	2.18064525e-06	0	0
I:/Guijie/Corona480/S2_80cmCap_20cmSamp_8cmCathoHH_02_ms2.msalign	206	1925	HCD	2758	2873.95	60	5	5090.41	5089.46	53	4.731e+08	31.7809	2531.18	2	sp|P02656|APOC3_HUMAN	Apolipoprotein C-III OS=Homo sapiens OX=9606 GN=APOC3 PE=1 SV=1	55	99		VAQQARGWVTDGFSSLKDYWSTVKDKFSEFWDLDPEVRPTSAVAA	Q.VAQQARGWVTDGFSSLKDYWSTVKDKFSEFWD(LDPE)[-0.0264]VRPTSAVAA.	5089.46	NONE		1	-0.0264:[33-36]	0		-	10	10	9.21808608e-05	0	0
I:/Guijie/Corona480/S2_80cmCap_20cmSamp_8cmCathoHH_02_ms2.msalign	207	1942	HCD	2778	2891.08	81	5	7705	7704.99	43	8.136e+05	-1000	2889.46	1	sp|P04114|APOB_HUMAN	Apolipoprotein B-100 OS=Homo sapiens OX=9606 GN=APOB PE=1 SV=2	3776	3846		TSSFALNLPTLPEVKFPEVDVLTKYSQPEDSLIPFFEITVPESQLTVSQFTLPKSVSDGIAALDLNAVANK	R.TSSFALNLPTLPEVKFPEVDVLTKYSQPEDSLIPFFEITVPESQLTVSQFTL(PKSVSDGIAA)[-0.0335]LDLNAVANK.I	7704.99	NONE		1	-0.0335:[53-62]	0		-	20	18	2.46285036e-06	0	0
I:/Guijie/Corona480/S2_80cmCap_20cmSamp_8cmCathoHH_02_ms2.msalign	209	2285	HCD	3178	3233.32	28	2	1715.86	1715.83	44	1.346e+06	-1000	3224.9	2	sp|P02656|APOC3_HUMAN	Apolipoprotein C-III OS=Homo sapiens OX=9606 GN=APOC3 PE=1 SV=1	45	60		DALSSVQESQVAQQAR	K.DALSSVQ(E)[-0.0134]SQVAQQAR.G	1715.83	NONE		1	-0.0134:[8]	0		-	18	16	3.06891368e-06	0	0
I:/Guijie/Corona480/S2_80cmCap_20cmSamp_8cmCathoHH_02_ms2.msalign	210	2545	HCD	3522	3546.83	29	3	2475.22	2476.18	12	4.054e+05	-1000	3590.55	3	tr|V9GYJ8|V9GYJ8_HUMAN	Apolipoprotein C-II OS=Homo sapiens OX=9606 GN=APOC2 PE=3 SV=1	62	87		SKSTAAMSTYTGIFTDQVLSVLKGEE	Y.(SKSTAAMSTYTGI)[-286.1842]FTDQVLSVLKGEE.	2476.18	NONE		1	-286.1842:[1-13]	0		-	16	14	4.4032744e-10	0	0
I:/Guijie/Corona480/S2_80cmCap_20cmSamp_8cmCathoHH_02_ms2.msalign	215	2587	HCD	3571	3589.44	36	3	2476.22	2476.18	39	2.566e+07	15.9651	3578.47	3	sp|P02655|APOC2_HUMAN	Apolipoprotein C-II OS=Homo sapiens OX=9606 GN=APOC2 PE=1 SV=1	76	101		SKSTAAMSTYTGIFTDQVLSVLKGEE	Y.(SKSTAAMSTYTGI)[-286.1835]FTDQVLSVLKGEE.	2476.18	NONE		1	-286.1835:[1-13]	0		-	19	16	1.36801026e-06	0	0
I:/Guijie/Corona480/S2_80cmCap_20cmSamp_8cmCathoHH_02_ms2.msalign	219	2679	HCD	3704	3714.71	42	3	2550.19	2550.17	8	1.228e+07	-1000	3715.13	11	sp|P0C0L4|CO4A_HUMAN	Complement C4-A OS=Homo sapiens OX=9606 GN=C4A PE=1 SV=2	957	979		TLEIPGNSDPNMIPDGDFNSYVR	R.TLEIPGNSDPNMIPDGDFNSYVR.V	2550.17	NONE		0		0		-	16	15	7.5074558e-12	0	0
